# Supplementary material for: High-Throughput Mechanistic Screening of Epigenetic Compounds for the Potential Treatment of Meningiomas
Source: J Clin Med. 2021 Jul 16;10(14):3150. doi: 10.3390/jcm10143150 (PMC8303324; doi:10.3390/jcm10143150)
Supplement: Supplementary file 1 [file jcm-10-03150-s001.zip › jcm 1250286 XML Supplementary Tables S1-S11.xlsx]

## Sheet: Supplementary Table S1
Compound	CH157	GAR	H23-3	IOMM Lee	J10-6	J11-2	J11-6	J11-7	J13-2	J15-4	J16-5	J17-2	J17-7	J18-6	J18-7	J19-2	J19-3	J19-4	J19-5	J19-6	J19-7	J2-2	J21-4	J21-5	J21-7	J4-1	J4-4	J7-6	J8-3	J8-4	J9-3	JEN
(-)-JQ1	0.969965	1	1	1	1	1	0.988485	0.897972	0.960996	0.972653	1	1	0.829298	0.788729	0.96938	1	0.991464	1	0.925202	0.937747	1	1	1	1	0.946409	0.958162	1	1	1	0.920913	1	0.975846
(-)-Neplanocin A	0.917669	0.96373	0.935171	0.477466	0.927249	1	0.980547	1	0.934817	1	1	0.962586	0.822115	0.927329	0.977452	0.995923	0.994646	0.910529	0.834365	0.984561	1	0.960124	1	1	1	1	0.863109	1	1	0.951973	0.982157	0.859311
(+)-Abscisic Acid	1	1	0.970259	1	0.973616	0.939877	1	0.872891	0.988447	0.952962	1	1	0.791011	0.909619	1	1	0.920391	1	1	0.877582	0.925679	0.96825	1	0.915251	0.890096	1	1	1	1	0.873949	0.95891	1
(+)-JQ1	0.906785	1	0.723941	0.952944	0.943728	0.906459	0.884286	0.669354	0.906858	1	0.920009	0.972374	0.630025	0.483357	0.626921	0.75792	1	1	0.792303	0.870071	0.790052	0.696371	0.861056	0.570293	0.979354	0.94643	0.598899	1	0.576471	0.814351	0.745266	0.892249
(R)-PFI-2 (hydrochloride)	0.871935	0.794321	0.911007	0.886408	1	0.975745	1	1	0.948019	0.952794	0.90751	0.936476	1	0.851278	0.950267	1	0.881043	0.839689	1	1	1	0.970089	1	1	0.97889	1	1	0.985468	1	1	1	0.772685
1-Naphthoic Acid	1	1	0.962438	0.957039	1	0.909135	0.991351	1	1	0.941681	1	1	0.83672	0.844396	0.996933	1	1	1	1	0.843783	1	0.988882	0.98756	1	0.937195	1	1	1	1	0.90613	0.999076	0.908922
2-hexyl-4-Pentynoic Acid	0.920191	0.980648	0.908512	1	1	0.960416	1	1	1	0.969111	0.900836	0.979921	0.935704	0.826973	1	1	0.929749	0.989402	1	1	1	0.972426	1	1	0.99841	1	1	0.987681	1	1	1	0.982502
2-PCPA (hydrochloride)	0.994462	0.94346	1	1	1	1	0.991041	1	0.966613	1	1	0.964783	1	0.922692	1	1	0.88988	1	1	1	0.967243	0.9971	1	0.97398	0.971859	0.972753	0.965048	0.876776	1	1	1	0.971342
2,4-Pyridinedicarboxylic Acid	1	1	1	0.980326	1	1	0.994443	0.95992	1	0.938407	0.877458	1	0.808968	0.766617	0.960697	1	1	1	0.822712	0.891735	1	0.98907	1	1	1	0.982707	1	0.920124	0.982487	1	0.982534	0.952195
2',3',5'-triacetyl-5-Azacytidine	0.993447	0.919512	1	0.941313	0.948507	0.967823	0.976038	1	0.914703	0.993524	1	1	0.902481	0.925841	1	1	1	1	0.953462	0.884603	0.990163	0.952674	1	0.986825	1	1	0.959679	1	1	0.989689	0.889172	1
3-amino Benzamide	1	1	0.995594	1	0.996266	1	1	0.835611	0.885135	0.938736	1	0.964356	0.803261	0.922094	0.992242	0.984253	0.95911	0.943942	0.978965	0.955412	0.904492	1	0.999381	1	0.912549	1	1	1	1	0.954564	0.977002	1
3-Deazaneplanocin A	0.859743	0.795681	0.938617	0.707714	1	0.924155	1	1	0.977107	0.956925	0.899625	0.961488	0.81645	0.798183	1	1	0.794343	0.935441	1	0.978545	0.843168	0.903464	0.9089	1	0.974693	1	0.784641	0.861911	1	0.957473	0.981373	0.829855
3-Deazaneplanocin A (hydrochloride)	1	0.928854	0.951925	0.63767	1	1	1	1	0.895781	0.973332	0.955357	0.820019	0.700011	0.754072	0.987609	1	0.941064	0.941381	1	0.936364	0.921528	1	0.972328	1	0.943423	1	0.81409	0.928569	0.992574	0.965921	0.96	0.814903
3,3'-Diindolylmethane	0.900951	0.966966	0.763671	1	1	0.886979	0.993996	1	1	0.946335	0.954546	1	1	0.753327	0.955205	1	0.960298	0.936774	1	1	0.901961	0.891988	1	1	0.990152	1	0.965824	0.956112	0.995944	0.986101	0.979129	1
4-iodo-SAHA	0.885992	0.851531	0.992508	0.315236	1	0.942454	1	0.852754	0.698271	0.925745	1	1	0.707356	0.905057	1	0.966665	0.864856	0.817123	0.930177	1	0.948104	0.925227	0.972118	0.892344	1	1	0.853534	0.674648	0.879503	0.811497	0.751278	0.907607
5-Azacytidine	1	1	0.912752	0.898447	1	0.974175	0.963192	0.954554	0.997413	0.964987	1	0.932546	0.884613	0.872263	1	1	1	1	0.943901	0.947802	0.93708	0.955023	0.987321	1	0.986384	0.960578	1	1	1	0.885066	0.974332	0.99345
5-Methyl-2'-deoxycytidine	1	0.93472	0.954474	0.959172	1	0.959853	1	1	1	0.942586	1	1	1	0.856005	0.997888	1	0.898093	0.959744	1	1	1	0.968982	1	1	0.956529	0.948406	1	0.982107	1	0.9416	1	0.977524
5-Methylcytidine	0.947749	0.987349	0.916166	1	1	0.975768	1	1	1	0.939699	1	0.98292	1	0.836411	1	1	0.932852	1	1	0.993382	0.985494	0.988285	1	1	0.975032	1	1	1	1	1	1	1
6-Thioguanine	0.473802	0.547727	0.893749	0.31696	0.832135	0.992667	0.967507	0.91163	0.979671	0.980852	0.795122	0.876404	0.783618	0.711329	0.895158	0.804808	0.921631	0.822269	0.946231	0.876497	0.816606	0.954025	0.920396	0.72795	0.991785	1	0.620896	0.835579	1	0.832251	0.931222	0.482522
a-Hydroxyglutaric Acid (sodium salt)	1	1	0.977684	0.869021	1	1	0.974958	0.957197	1	0.994814	0.895417	1	0.994384	0.934755	0.97709	1	1	0.833117	1	0.992583	1	0.878349	1	1	1	1	1	0.971585	1	1	0.983614	0.968479
AGK2	1	1	0.941138	0.872592	1	1	1	0.995646	1	0.991071	0.893014	0.971662	0.857628	0.873679	0.964687	1	1	0.832605	1	1	1	1	1	1	0.988429	1	1	1	0.977851	0.958805	0.891208	0.960374
AGK7	1	0.961938	0.920487	1	1	0.901322	1	1	1	0.937494	0.978071	0.952758	1	0.809557	1	1	0.974316	1	1	0.992878	1	1	1	1	1	0.918708	1	1	1	1	1	0.955637
AK-7	0.982318	0.975176	1	0.929089	1	0.91836	1	0.902838	1	0.945443	0.770512	1	1	0.877544	1	1	0.852043	0.903509	1	0.952536	0.920163	0.994891	1	1	0.897165	0.89598	1	0.999414	0.9751	1	1	0.994152
Anacardic Acid	1	0.985249	0.931345	1	1	0.958271	1	0.97269	0.994059	0.988848	0.957141	1	0.877159	0.830144	0.958759	1	1	0.867632	1	1	0.942674	0.937538	0.976757	0.970243	0.961528	0.968272	1	1	0.974906	1	0.994549	0.986597
Apicidin	0.447789	0.709304	0.737717	0.320503	0.986528	1	0.911276	0.801621	0.87403	0.921718	0.967845	0.943792	0.700133	0.601726	1	0.999259	0.588494	0.673594	0.670158	0.696021	0.923947	0.752719	0.938978	0.765693	0.963031	1	0.527449	0.85277	0.864452	1	0.718787	0.563722
BIX01294 (hydrochloride hydrate)	0.347864	0.43668	0.648887	0.434337	1	1	1	0.681112	0.924872	0.972641	0.948224	1	0.931382	0.943255	0.986458	1	1	0.913661	1	1	1	0.987356	0.956462	0.891215	0.984561	0.995152	0.240209	0.629838	1	0.905596	0.76477	0.986371
BML-210	0.937523	0.90252	0.94851	1	1	0.974554	0.963688	1	1	0.944548	1	1	1	0.856374	0.978907	1	0.897521	0.927546	0.978427	1	1	0.915774	0.962313	1	0.900925	1	1	0.960347	0.968847	1	0.996954	1
BRD73954	1	1	0.961014	1	1	0.999992	0.956906	0.98475	0.974965	0.972807	1	1	1	0.937469	0.983246	0.983725	0.952889	0.944309	0.994324	0.971114	1	0.913355	0.937643	0.979231	0.984047	0.941249	1	0.926307	0.88633	0.792354	0.928824	0.999664
Bromosporine	0.992895	0.941326	0.808619	1	1	0.931766	1	1	1	0.944024	1	1	1	0.686486	0.904612	0.93712	0.968786	1	1	0.979799	0.962181	0.747124	0.972041	0.736846	0.996758	0.936586	0.860177	0.819802	0.586058	0.613192	0.880013	0.977087
BSI-201	1	1	1	1	1	0.935771	0.992206	0.950266	0.956624	0.950581	0.997523	1	0.787047	0.729799	0.971604	1	1	1	0.918573	0.970354	0.922085	0.984229	0.94995	1	0.950964	1	1	1	1	0.865818	1	0.968659
Butyrolactone 3	1	1	0.899267	1	1	0.976496	1	0.952161	0.997589	0.988734	0.904573	0.995806	0.877635	0.835581	0.959699	0.988956	1	0.927234	1	0.909852	0.938259	0.924038	0.958896	0.920996	0.934809	0.955799	1	1	1	1	0.991287	0.996162
C646	1	1	0.909564	0.951182	0.986341	0.91179	0.999156	0.948749	0.968523	0.930666	0.904012	0.910133	1	0.889157	1	1	0.961558	0.929908	0.89583	0.971133	1	0.985359	0.973528	1	0.930417	1	0.974211	1	1	0.82511	0.98446	1
CAY10398	0.285734	0.561067	0.887492	0.501483	1	0.921833	0.946759	0.812165	0.946931	0.944852	0.994535	0.933165	0.840972	0.833403	0.892986	0.969134	0.721805	0.935884	0.873137	0.840362	1	0.910756	0.885938	0.927238	0.948619	1	0.561868	0.663182	0.806235	0.772978	0.874676	0.657771
CAY10591	0.906487	0.895183	0.98512	0.906569	1	0.997445	1	1	1	0.945472	1	0.97242	0.999712	0.833468	0.987445	1	0.883951	1	0.856165	1	1	0.968452	0.946165	1	0.97733	1	1	1	1	1	1	0.84262
CAY10603	0.58859	0.561609	0.967932	0.302251	0.994801	0.900222	0.985631	0.862417	0.834632	0.933204	0.993014	0.847871	0.740418	0.938766	1	0.969705	0.771376	0.817895	1	0.81374	1	1	0.940886	0.917312	0.990472	0.940236	0.802938	0.82283	0.899103	1	0.955578	0.782841
CAY10669	1	1	1	1	0.980375	1	0.999588	1	1	0.976717	0.978507	1	0.867795	0.814286	1	1	1	0.921013	0.924747	0.922349	1	0.978429	1	1	0.967438	0.968564	1	1	0.959772	1	0.977089	0.95733
CAY10683	1	1	0.990756	1	0.965839	0.966222	0.983114	1	0.951125	0.963413	0.905207	1	0.969301	0.962923	1	1	0.985937	0.983648	1	0.916457	1	0.98468	0.960884	1	1	0.954042	1	1	1	1	0.995445	0.960809
CBHA	0.9564	0.962401	0.920366	0.862547	1	0.976377	1	0.887943	0.915259	0.993437	0.874543	0.904918	0.8605	0.838683	0.917223	1	0.937453	0.936826	1	0.87769	0.894543	1	1	1	1	0.93235	0.945146	0.801348	1	1	0.947924	0.840522
CCG-100602	1	1	0.983283	0.945435	1	1	0.975388	0.933708	0.980333	0.980922	0.815624	0.960184	0.783912	0.853918	1	1	1	1	0.895567	0.976858	0.996147	1	1	1	0.979181	1	1	0.941684	1	1	0.99593	0.965502
Chidamide	0.894561	0.929325	0.981277	0.842796	1	0.891633	1	1	1	0.944484	0.944196	1	1	0.874748	1	1	0.806919	0.942999	1	0.954532	1	0.90434	1	0.883114	0.925871	0.928914	1	0.986137	0.880162	1	1	1
CI-994	0.873214	0.852714	1	0.593188	1	0.970165	0.984543	0.884344	0.858687	0.995928	0.970107	0.955145	0.94514	0.922936	1	0.95403	0.946565	0.931437	0.924103	1	1	0.896923	0.996693	0.952643	0.943564	1	0.896452	0.880573	0.880727	0.758333	0.986955	0.889795
Cl-Amidine (hydrochloride)	1	1	1	0.942098	1	0.933961	1	0.979476	1	0.98014	1	0.987597	0.905253	0.932964	1	1	1	0.916037	0.874196	0.882618	0.907985	1	1	1	1	0.97678	1	1	1	0.978804	1	1
coumarin-SAHA	0.981466	0.986175	0.894898	0.732591	1	0.907476	1	0.897471	0.827799	0.98656	0.863333	0.958635	0.709408	0.894075	0.879982	1	0.849285	0.989068	1	0.743322	0.808315	0.875644	0.931522	0.76106	1	0.986041	0.760876	0.62766	0.991475	1	0.91746	0.906646
CPI-203	0.992707	0.982243	0.556347	0.867851	0.782181	0.989975	0.935283	0.690428	0.952845	1	0.700627	1	0.738593	0.434527	0.66203	0.803148	1	1	0.964596	1	0.951111	0.611372	0.872766	0.519018	0.950692	0.85915	0.538845	0.679652	0.613564	0.681699	0.849188	0.864123
CPTH2 (hydrochloride)	1	1	1	0.808209	1	0.920569	1	0.918656	0.931935	0.973185	0.940062	0.890132	0.798304	0.818246	0.955753	1	0.950981	0.936796	0.970823	0.858341	0.893645	0.979613	0.860358	0.770941	0.908257	0.983256	0.920956	0.834956	0.879345	0.743298	0.991271	0.970616
CUDC-101	0.860571	0.868474	0.858238	0.852811	1	0.926518	1	1	0.937058	0.962359	1	1	1	0.836346	0.933916	1	0.715061	0.867091	0.886241	0.961822	0.809395	0.657489	0.994772	0.869723	1	1	0.823468	0.579454	0.828202	1	0.910503	0.954035
Daminozide	1	1	1	1	1	0.894292	0.985344	0.948224	0.992911	0.958396	1	0.925685	0.832466	0.990419	1	1	0.940705	0.991581	0.823715	0.932696	0.987549	0.972997	1	1	0.954939	1	1	1	1	0.899793	1	0.995156
Decitabine	0.994618	1	0.948281	0.852027	1	0.98151	1	0.852552	0.878936	0.974849	0.834911	0.858368	0.827936	0.936591	0.957287	1	0.932044	0.93273	1	0.951199	1	1	0.997218	0.98243	1	1	0.908737	0.925674	0.994233	0.946437	0.959787	1
Delphinidin (chloride)	1	1	0.977826	0.934383	1	1	1	1	0.991884	1	0.912305	0.986968	0.828384	0.900779	1	1	1	0.885187	0.871595	1	1	0.98118	1	1	0.946315	0.97411	1	1	0.945133	0.954934	0.987168	1
DMOG	1	0.9016	1	0.779089	0.931328	1	0.989569	1	1	0.983196	1	1	0.934104	0.846811	0.996576	0.960926	0.991471	0.894418	0.983249	0.921334	1	0.904468	0.993989	0.967165	1	1	0.950395	1	0.973698	0.879559	0.98353	0.940483
Ellagic Acid	1	1	0.943899	0.975472	1	0.936094	1	0.890488	0.998097	0.978411	0.979266	0.831145	0.772707	0.95488	1	1	0.967962	0.98829	1	0.778074	0.942675	0.96422	0.960426	0.737694	0.974749	0.952542	0.962463	0.980585	1	0.980338	0.985896	1
EPZ005687	0.949328	0.978954	0.99917	0.948878	0.979971	0.939817	0.997	1	0.988019	1	1	1	0.978985	0.987794	0.976327	1	1	1	1	1	0.874193	0.9968	1	0.962145	1	0.969858	0.989221	1	1	1	1	0.992252
EPZ5676	0.994605	1	1	0.998359	1	1	1	1	1	0.923173	0.94478	1	0.945765	1	0.998779	1	0.997846	0.828478	1	0.960532	1	0.860292	1	1	0.998482	1	1	0.986643	1	1	1	0.949286
Etoposide	1	1	0.936339	0.800989	0.996629	0.941887	0.997679	0.916959	1	0.991082	0.975291	1	0.97259	1	1	0.960125	0.941303	0.938666	1	0.770961	1	0.924876	0.961869	0.810077	0.949653	1	0.965138	1	0.909365	0.858808	0.940667	0.972174
EX-527	0.862187	0.963446	0.963966	1	1	1	1	0.926974	1	0.940388	0.991307	0.96617	0.984018	0.873176	0.988604	1	0.874587	0.881228	0.802286	1	1	0.86309	0.972615	1	0.968949	1	1	0.998511	1	0.856616	0.960616	1
F-Amidine (trifluoroacetate salt)	1	1	1	1	1	0.87735	1	0.97866	0.981703	1	1	0.948887	0.870613	1	1	1	1	0.897988	0.923549	0.944037	1	0.98291	1	1	0.978267	0.99366	1	1	1	0.912452	1	1
Garcinol	1	1	1	0.878568	0.97943	0.929331	0.988166	1	0.853456	0.984758	0.914286	0.910706	0.891163	1	1	0.979419	0.973046	0.892529	0.962835	0.93881	1	1	1	0.945787	0.94481	1	0.993788	1	1	1	0.842493	0.988023
Gemcitabine	0.455747	0.784116	0.864039	0.499903	0.8242	0.784665	0.863448	0.631061	0.666292	0.939382	0.499868	0.83363	0.621372	0.531845	1	0.446965	0.681195	0.726442	0.553423	0.721815	0.554048	0.762384	0.693667	0.714018	0.94776	1	0.468757	0.880825	0.731245	0.559417	0.867027	0.609597
GSK-J1 (sodium salt)	1	1	1	1	1	0.992111	0.952477	0.914436	1	0.961622	1	0.940175	0.88035	0.89567	0.956093	1	0.971195	1	0.879338	0.935836	1	0.978228	1	1	0.973424	1	0.981451	1	1	0.869961	0.952349	0.975175
GSK-J2 (sodium salt)	0.945421	1	1	0.927127	1	1	0.989052	0.856901	0.930844	0.978485	1	0.972433	0.893096	0.874238	0.971877	0.986703	0.900219	1	0.792106	0.911986	0.972007	0.924441	0.966682	1	0.916817	1	1	0.987676	0.956268	0.783047	0.964981	0.974267
GSK-J4 (hydrochloride)	1	1	1	1	1	1	0.937071	1	0.953095	1	1	0.962759	0.979406	0.950961	1	0.980326	1	1	0.941638	0.987524	0.965664	0.929827	1	0.97951	0.932114	1	0.992784	1	1	0.846523	0.926484	1
GSK-LSD1 (hydrochloride)	0.984598	0.98086	0.987455	1	1	1	0.9951	1	1	0.917831	1	0.999098	1	0.868739	0.989044	1	0.898229	0.970608	1	1	1	0.903229	0.960047	1	0.99798	1	1	1	1	1	1	1
GSK126	1	0.850154	0.989515	0.800442	0.98727	1	0.99152	1	1	0.940771	0.921327	1	0.959223	0.823791	0.978615	1	1	0.947002	1	0.903762	1	0.957744	0.992524	1	0.979884	0.989178	1	0.973075	0.992992	1	0.998145	0.765997
GSK2801	0.944865	0.938954	1	0.994797	1	0.911297	1	1	1	0.944134	1	1	1	0.904141	1	1	0.933503	0.954607	1	1	1	0.97463	0.964924	1	0.977423	1	0.960945	0.866285	1	0.991188	1	0.997614
GSK343	0.841613	0.96964	0.85774	1	1	0.967308	1	0.975766	1	0.923085	1	1	1	0.840627	1	1	0.875153	0.931655	1	0.929779	1	0.980939	1	1	0.990532	0.994581	0.950423	0.976721	1	1	0.988414	1
GSK4112	1	1	1	1	1	0.945406	0.976748	0.952666	0.923184	0.986078	1	1	0.822525	0.827454	0.982978	1	0.947653	1	0.878119	0.900469	0.943628	0.987598	0.977042	1	0.910924	1	1	1	1	0.782803	0.980384	1
HC Toxin	0.377381	0.469692	0.511326	0.275503	0.619196	1	0.616455	0.67569	0.715799	0.921023	0.500967	0.666542	0.417492	0.422453	0.643214	0.47117	0.498667	0.621093	0.544446	0.320601	0.342293	0.637522	0.759811	0.571765	0.929709	1	0.28219	0.286848	0.659061	0.906745	0.438401	0.277219
HNHA	0.984985	0.961796	1	1	0.944886	0.984875	0.971553	0.992512	0.999764	0.955832	0.942677	0.992858	0.837633	1	1	1	0.970386	1	0.966086	0.90961	1	0.984868	0.957372	0.907196	0.99533	1	0.99575	0.86477	0.985196	1	1	1
HPOB	0.971971	0.968421	1	1	1	0.872184	1	1	1	0.962924	0.918254	0.923735	1	0.891594	0.977389	1	0.892647	1	1	0.979005	0.898445	0.977641	1	1	0.961697	0.984186	1	0.99246	1	1	0.995155	0.978107
I-BET151	0.791801	0.912322	0.928362	1	1	0.926788	0.998238	0.92849	0.876004	1	0.991866	0.917271	0.811655	0.852922	0.743715	0.867567	0.940966	1	1	0.972495	0.901207	0.778173	0.97074	0.798642	0.945292	1	0.628844	0.810217	0.773434	0.652484	0.866862	1
I-BET762	0.841284	1	0.681777	0.962991	1	0.90591	0.94222	0.650792	0.894689	1	0.683355	0.973494	0.713089	0.639964	0.781635	0.84563	1	1	0.930304	1	0.975695	0.763202	0.875889	0.6867	0.968696	1	0.61025	0.94629	0.682601	0.851695	0.800652	1
I-CBP112 (hydrochloride)	1	0.982933	0.976339	0.747384	1	1	1	0.976347	0.98483	0.986274	0.982729	1	0.983358	0.990233	1	1	1	0.966889	1	0.952198	0.927539	0.927375	1	0.921383	1	1	1	0.949927	0.992722	1	1	0.959624
IOX1	1	1	0.976502	0.886744	1	0.941929	0.953618	0.900073	1	0.982357	0.938763	0.923118	0.815287	0.838895	0.983737	0.993799	0.994453	0.86868	0.845168	0.96893	1	0.925429	1	1	0.972306	0.943276	1	1	1	0.870517	0.973806	1
Isoliquiritigenin	1	1	0.945791	1	1	0.975607	0.975423	1	0.975821	1	1	1	0.808337	0.756798	0.918298	1	1	0.904081	1	0.969643	0.902759	0.994858	1	1	0.978416	1	1	1	1	1	1	0.990677
ITF 2357	0.948159	0.981288	0.826396	0.547349	1	0.952175	0.964924	0.912558	0.868844	1	1	0.998655	0.859205	0.908367	1	1	0.758025	0.934422	0.983224	1	0.997348	0.822857	1	0.920962	1	0.991283	0.721872	0.828364	1	0.87763	0.735315	0.771512
JGB1741	1	1	1	0.998271	1	0.953689	1	0.953744	0.982589	1	1	1	0.90413	1	1	0.974534	1	0.928581	0.906148	0.940603	0.872284	1	1	1	1	1	0.923232	1	1	1	0.948925	1
JIB-04	0.843805	0.904831	0.478956	0.727285	0.785878	0.529776	1	0.986441	1	0.821859	1	0.930397	1	0.257039	0.983459	0.779236	0.356573	0.327649	0.733977	0.305154	0.35764	0.816003	0.775329	0.805236	0.99835	0.934826	0.938658	0.510805	0.81071	0.438613	1	0.983342
LAQ824	0.353217	0.386744	0.519759	0.391322	0.613942	0.988562	0.779517	0.674613	0.460363	0.895456	0.726881	0.771334	0.484898	0.357808	0.604358	0.436762	0.432937	0.443263	0.425193	0.379933	0.343397	0.385257	0.717129	0.557394	0.919915	0.966107	0.309843	0.77938	0.549195	0.214384	0.460308	0.546003
Lestaurtinib	0.965404	0.994691	0.79634	0.928471	0.99166	0.910274	0.87125	0.935554	0.735336	1	0.700093	1	0.756293	0.54962	0.661635	0.639174	0.738543	0.82857	1	0.623667	0.811701	0.630397	0.905332	0.495334	0.89708	0.997864	0.6973	0.974592	0.87687	0.986628	0.862363	1
Lomeguatrib	1	1	1	1	1	0.959268	0.969117	0.916524	0.961114	0.954539	1	0.901571	0.761181	0.927928	0.959544	1	0.880584	1	0.953422	0.940785	0.874393	0.944862	0.968548	0.983909	0.897045	1	1	1	0.958632	0.792885	0.974763	1
M 344	0.467218	0.660078	0.924922	0.567544	0.998187	0.994392	0.995578	0.885644	0.959698	0.936619	0.844732	0.886042	0.813661	0.925991	0.916052	1	0.8817	0.865737	1	0.855316	0.887344	0.906337	0.977692	0.784875	1	0.96658	0.670541	0.742152	1	0.922635	0.830198	0.762258
MC 1568	1	1	0.992779	0.979197	0.995752	1	0.969838	1	1	0.954764	1	1	0.920438	0.901756	0.979102	1	0.982594	0.995183	1	1	1	1	0.988023	1	0.973476	1	0.988326	0.956467	0.977611	0.959504	1	0.936188
Methylstat (hydrate)	0.972669	0.919561	0.953732	0.797864	1	0.887689	0.992324	0.856704	1	0.928212	1	1	0.805517	0.823362	0.913967	1	0.988747	0.992546	1	0.920702	0.967447	0.982902	1	1	0.935067	1	1	1	0.996661	0.884557	0.964948	0.985963
MI-2 (hydrochloride)	1	1	1	0.808795	0.985168	0.96186	0.998041	0.921074	0.999221	1	0.754943	0.866565	1	0.958578	0.984269	0.977723	0.993366	0.983823	0.84873	1	1	0.989913	1	0.991542	0.966509	0.974271	1	1	0.996102	0.878264	1	1
MI-nc (hydrochloride)	0.545269	0.438924	1	0.241616	1	0.958861	1	0.854035	0.918589	0.938515	0.817204	0.872902	0.711855	1	0.919763	1	0.86623	0.966614	0.971796	0.921768	0.91996	0.960463	0.91342	1	0.904328	1	0.736302	0.63552	0.894452	0.776741	0.968969	0.786527
Mirin	1	0.910017	1	0.909794	1	1	0.976403	0.9423	0.903844	0.965338	0.96012	1	0.919462	0.930051	1	1	0.958451	1	1	0.86717	1	0.946397	0.936004	0.905511	1	1	0.967076	0.967518	1	0.980407	0.942566	1
MS-275	0.478529	0.758863	1	0.503187	0.963186	1	1	0.846808	0.90427	0.907543	0.985325	1	1	0.99733	1	1	0.907322	0.965803	1	0.980567	0.915359	0.85625	0.941587	0.815158	1	0.984585	0.865891	0.949111	1	1	0.933913	0.900031
N-Oxalylglycine	0.988917	0.969837	0.954076	1	0.98762	0.957716	1	1	0.998745	1	1	1	0.958441	0.890923	1	1	1	0.94097	1	0.965914	1	1	0.977529	0.915642	0.952482	0.97318	0.995203	0.865193	1	1	1	0.976311
Nicotinamide	1	0.997618	0.997791	1	1	1	0.993748	0.979426	0.998026	0.958087	0.992028	1	0.834465	0.834468	0.978685	1	1	0.966077	1	0.976411	0.89781	0.988222	0.992017	1	1	1	1	1	1	1	1	0.976258
Octyl-a-ketoglutarate	1	1	1	1	1	0.933748	0.980596	0.930372	0.92461	0.979959	1	1	0.778565	0.895353	1	1	0.953892	1	0.906261	0.863254	0.999715	1	0.9766	1	0.962764	1	1	0.953028	1	0.795183	1	0.999453
OTX015	0.92074	0.947079	0.748519	0.972905	1	0.885293	1	0.769264	1	0.994768	0.877075	1	0.931678	0.444328	0.810777	0.882456	1	1	1	0.904119	0.919663	0.611223	0.894434	0.705328	0.909085	0.887693	0.64169	0.950201	0.511469	1	0.854603	0.982752
Oxamflatin	0.534548	0.653597	0.892425	0.57895	1	0.973233	0.966759	0.895643	0.993758	0.920086	1	0.938102	0.876734	0.881657	0.901527	1	0.869757	0.983539	1	0.814034	0.949111	0.922917	0.971701	0.902652	1	0.928539	0.742377	0.957865	1	0.75929	0.960355	0.775115
Panobinostat	0.399749	0.549793	0.455277	0.466215	0.466478	0.948119	0.48101	0.538505	0.495244	0.894035	0.400375	0.591484	0.329102	0.317717	0.477649	0.285427	0.523991	0.484461	0.37396	0.328347	0.254724	0.42291	0.499827	0.360155	0.526805	0.991279	0.296271	0.828816	0.570238	0.698707	0.421948	0.641073
PCI 34051	1	1	1	1	0.998436	0.980764	0.975	0.996645	0.896378	0.954365	1	1	0.869211	0.897887	1	0.962149	0.917975	0.871566	0.891839	0.948457	1	0.97843	0.989464	0.999272	0.96647	1	0.979661	0.964691	1	1	1	1
PFI-1	1	1	0.849608	1	1	0.947731	0.966351	0.969604	0.954493	0.953018	0.995718	0.922533	0.762989	0.739795	0.99867	1	1	1	0.897698	1	1	0.899937	0.961903	0.876301	1	0.893168	0.893747	0.649749	0.960474	0.64749	0.920395	0.959547
PFI-3	0.966413	0.940708	0.904991	1	1	0.954187	1	1	1	0.942684	0.821037	1	1	0.842271	1	1	0.888695	1	1	0.956042	0.97734	1	1	1	1	0.96745	1	0.949487	1	1	0.957115	0.968976
Phthalazinone pyrazole	0.997222	0.886549	0.91185	0.751879	1	1	1	0.978069	0.958441	1	0.872158	1	0.804129	0.730449	0.98221	1	1	1	0.962859	0.944382	0.975935	1	1	1	0.915608	1	1	0.733274	0.98295	1	0.919909	0.700729
Piceatannol	0.887399	0.972224	0.927853	0.97386	1	1	1	0.966792	1	0.940092	0.983807	0.979344	1	0.798006	1	1	0.963494	0.996897	0.920838	1	1	0.938629	1	1	0.950209	1	1	0.920739	0.894522	1	1	1
Pimelic Diphenylamide 106	0.979458	0.842071	0.993072	0.74976	1	0.939099	0.972257	0.98829	0.938344	0.952087	0.857557	1	0.945274	0.811098	1	1	1	0.941809	1	1	0.960652	0.934401	0.959348	0.94534	0.948396	1	1	1	1	1	0.970151	0.741369
Pyroxamide	0.91539	0.842084	0.987172	0.60675	0.958571	0.93718	1	0.996736	0.942314	0.939603	1	1	0.928207	0.928425	1	1	0.926189	0.934668	1	0.910282	0.978131	0.918505	0.985898	0.908942	1	1	0.764322	0.861504	1	1	0.945629	0.890259
RG-108	0.981071	0.951736	1	1	0.932477	0.943554	0.966337	1	1	0.974031	0.966384	1	0.982211	1	1	1	1	1	1	0.905984	0.880617	0.992007	1	0.883524	1	0.999283	1	0.997161	1	1	0.903548	1
RGFP966	1	0.974833	0.981516	1	1	0.972761	1	0.952676	1	0.939722	0.887089	0.999701	0.970891	0.868164	0.961014	1	0.896886	1	1	1	1	0.896739	0.990092	1	1	0.965507	1	0.959213	1	0.95827	1	0.956026
RSC-133	0.880866	0.963791	1	1	1	0.942537	1	0.986428	1	0.952711	0.989137	0.97229	1	0.893904	0.952752	1	0.831958	0.926806	0.967631	0.987649	0.880809	0.925638	0.98793	1	0.937386	1	1	0.998362	0.931864	1	1	1
Rucaparib (phosphate)	1	1	0.931633	0.676954	1	0.927234	0.967801	0.86306	0.912249	0.950869	1	0.95584	0.781019	0.758745	0.983504	1	0.929733	1	0.81569	0.949225	0.999284	0.963952	1	1	0.948687	1	1	0.954906	0.999266	0.747452	1	0.872904
RVX-208	0.753469	0.953964	1	0.982985	1	0.921393	0.924642	0.968131	1	0.979762	0.917405	0.957541	1	0.96347	0.926081	1	0.886165	0.975183	1	0.898243	1	0.956894	0.895307	0.961614	0.953388	1	0.940611	0.929875	0.848388	0.900543	1	1
S-(5'-Adenosyl)-L-methionine (tosylate)	1	0.830218	0.972553	0.835143	1	1	0.989513	1	0.991875	0.99397	0.890167	1	0.966298	0.918034	0.987083	0.998335	1	1	1	1	1	0.923457	1	1	0.972975	1	1	1	1	0.9865	1	0.782347
S-Adenosylhomocysteine	0.826393	0.899067	0.945889	0.806769	1	0.944567	0.899646	1	0.971994	0.969899	0.848045	1	0.88834	1	0.977228	1	0.83966	0.993416	1	0.886121	1	1	0.945686	0.90757	0.997441	1	1	0.991835	0.889295	0.974053	0.979751	0.899033
SAHA	0.457763	0.516303	0.926135	0.533116	1	0.937207	0.975318	0.938696	0.893105	0.90871	0.870395	1	0.900636	0.873742	1	1	0.774991	0.922893	1	0.939188	1	0.927749	0.962758	0.907813	0.954147	0.992667	0.485614	0.649984	1	0.908365	0.907547	0.654541
Salermide	0.965886	0.982299	0.970656	0.985095	1	0.993193	0.987696	0.962592	1	0.969486	1	0.967638	1	0.887722	0.984186	1	0.956762	1	1	0.850007	0.941681	1	0.932285	0.872214	0.969421	0.937024	1	0.935141	1	0.714815	1	0.974981
SB939	0.379803	0.482145	0.856644	0.289026	0.949512	1	0.951583	0.823814	0.884639	0.945112	0.863522	0.838014	0.657384	0.835238	1	1	0.692763	0.77495	0.909955	0.834381	1	0.752063	0.971233	0.738447	0.930127	1	0.345066	0.729195	0.986722	0.933499	0.633313	0.413703
Scriptaid	0.923116	0.930399	0.979425	0.758635	0.997617	0.945085	1	0.844873	0.910524	0.979662	0.852469	0.965502	0.848172	0.960747	0.920571	1	0.83369	0.926813	1	0.88853	0.942496	1	0.903722	0.940751	0.99319	1	1	0.861484	1	0.867131	0.855646	0.765715
SGC-CBP30	1	1	0.946901	0.920089	1	1	0.990278	1	0.992594	0.99389	0.949568	0.939365	0.92681	0.923598	0.984171	0.986538	1	1	0.933719	1	0.967949	0.96595	1	0.99187	0.986917	0.959193	1	1	1	1	0.948085	0.977842
SGC0946	0.795481	0.969023	1	0.973496	1	0.891936	0.940476	1	1	0.998646	0.755079	0.970214	0.947542	1	0.991011	1	0.859581	0.872778	1	0.881439	1	0.994244	0.902709	0.97696	0.997063	1	0.999326	0.925439	0.908313	1	1	1
SGI-1027	1	0.829169	0.829458	0.78463	1	0.99388	0.980121	1	1	1	1	0.991541	0.931017	0.930911	1	0.956901	0.909291	1	0.831862	0.886263	0.964259	0.992898	1	1	0.985164	0.97947	1	0.903172	0.992802	1	1	0.948409
Sinefungin	0.910903	0.867898	1	0.919625	0.987385	0.905273	0.941301	1	0.957222	0.935464	0.981588	1	1	0.970257	1	1	0.826338	0.870461	1	1	1	1	1	1	0.956641	1	1	0.889027	0.954034	1	0.979365	0.853204
SIRT1/2 Inhibitor IV	1	1	0.975305	0.997374	1	0.940273	1	1	1	0.963826	1	1	0.986603	0.885265	0.971292	1	1	0.982091	1	1	1	0.962374	1	1	1	0.977947	1	1	1	1	0.976545	0.958372
Sirtinol	1	0.968505	1	1	0.996704	0.888264	1	0.961569	0.959863	0.938231	0.899147	1	0.798796	0.91198	1	1	1	0.868388	1	0.910189	1	0.972757	1	0.998919	0.967615	1	1	0.944704	1	1	0.992744	1
Sodium 4-Phenylbutyrate	1	1	1	0.817783	1	0.989764	0.978874	1	1	0.935706	1	0.917466	0.871218	0.787052	0.952847	1	1	1	0.876099	0.894081	1	0.938884	1	1	0.977071	0.967939	1	1	1	0.945077	1	0.955726
Sodium Butyrate	0.981996	0.809873	0.98582	0.743854	0.980564	0.954366	1	0.970946	0.894375	0.992531	1	1	0.859621	0.97498	1	1	0.99277	1	1	0.903617	0.874629	1	0.945209	0.801677	0.946493	1	0.966924	0.939866	0.905629	0.967977	1	0.808851
Splitomicin	1	1	0.897761	0.801253	1	0.934017	1	0.964707	0.938282	0.990501	0.903217	0.897087	0.803791	0.836301	0.964762	1	0.958669	0.911264	1	0.852617	1	0.98104	0.95577	0.850878	0.994623	1	0.988889	0.98807	1	1	0.999822	0.952298
Suramin (sodium salt)	1	1	0.988739	1	1	1	1	1	1	0.95454	0.935254	0.977979	0.872529	0.854831	0.984019	1	1	0.982753	1	0.96471	0.870404	0.9212	1	1	0.978735	1	1	1	0.967412	1	0.987624	0.977411
Tenovin-1	1	1	0.985659	1	1	0.977664	1	0.904781	0.965968	0.955809	0.886863	1	0.88433	0.975927	0.950991	1	0.964458	0.977726	1	0.951105	0.798378	0.996287	0.950145	0.886927	0.960581	0.997719	1	0.868077	0.939515	1	0.952355	0.990322
Tenovin-6	1	1	0.976845	0.995885	1	0.957536	1	0.894219	0.817636	0.980522	0.972772	1	0.909053	0.777028	0.949272	1	0.957608	1	1	0.935931	0.840691	0.931211	0.933958	0.872101	0.927862	1	1	1	0.900719	0.875403	0.992058	0.967759
trans-Resveratrol	0.934256	1	0.984077	1	1	1	0.979412	0.973744	1	0.976072	1	1	1	0.858079	0.996927	0.952635	0.940204	0.987589	0.994812	0.977997	1	0.927989	0.914883	1	0.983219	1	0.952437	1	0.986903	0.928471	1	0.974985
Trichostatin A	0.397359	0.626722	0.76698	0.511151	1	1	0.941206	0.881812	1	0.977614	0.897455	1	0.819457	0.79421	0.953963	0.959123	0.584238	0.735311	0.790262	0.776907	0.968131	0.676403	0.8459	0.801392	0.932412	0.999373	0.560914	0.751786	0.889249	0.688783	0.737287	0.69844
Tubacin	0.854101	0.873124	1	0.867206	1	0.923631	1	1	1	0.90498	0.924956	1	0.973163	1	1	1	0.898282	0.886704	1	0.966243	0.983227	0.941506	1	0.915654	1	0.993166	0.993822	0.967299	0.958473	1	1	1
Tubastatin A	0.797067	0.953232	1	1	1	0.840846	0.925462	1	1	0.984051	0.9414	0.970837	1	0.995648	0.975979	1	0.883758	0.934878	1	0.87872	1	1	0.910414	1	1	1	0.9941	0.930637	0.871598	1	1	1
Tubastatin A (trifluoroacetate salt)	0.980574	1	1	0.911345	0.991935	0.896096	0.978098	1	0.886263	0.96944	0.9936	1	0.899502	0.99283	1	1	1	0.907151	0.942173	0.981541	1	0.952988	1	0.951787	0.988383	1	0.994265	1	1	0.85475	0.957368	1
UNC0224	0.854151	0.819013	1	0.558717	0.993997	0.963524	1	1	1	0.941233	0.799024	1	0.9159	1	0.983506	1	0.799087	0.888803	1	0.992928	0.958803	0.952001	1	0.882322	1	1	0.973749	0.878042	0.999843	0.37914	1	1
UNC0321 (trifluoroacetate salt)	1	1	1	0.941031	1	1	1	1	1	0.974301	0.912148	0.970533	0.888896	0.88078	0.971353	0.968423	1	0.928916	0.886194	0.914346	1	1	1	1	0.972756	1	1	1	1	0.848781	1	0.97972
UNC0631	0.787148	0.744808	0.403653	0.221495	1	1	1	0.844492	0.861312	0.988348	0.905139	0.870249	0.753973	0.776496	0.944738	1	0.816556	0.874474	1	0.869051	1	0.622972	0.883212	0.855141	0.960629	1	0.331814	0.655598	0.548517	1	0.701806	0.808459
UNC0638	0.342873	0.78168	0.864129	0.31919	1	0.987894	1	0.739961	0.902427	0.960748	0.887238	0.967928	0.787233	0.808881	0.925207	1	1	0.974239	1	0.929804	0.926997	1	1	1	0.91658	1	0.245079	0.362737	1	0.699738	0.818194	0.977491
UNC0642	0.438416	0.597672	0.902653	0.346469	1	1	0.99672	1	0.985992	0.987731	0.841651	0.990624	0.99422	0.862714	1	1	1	0.987292	1	1	0.884011	0.939478	1	1	1	0.991541	0.586159	1	1	0.764004	1	0.950882
UNC0646	0.318569	0.530146	0.911098	0.224045	1	0.96362	1	0.821503	0.882703	0.905947	0.913628	1	0.757551	0.892322	0.954969	0.97111	0.783285	0.919548	1	0.870896	0.919511	0.959489	1	1	1	1	0.450615	0.363632	1	0.843978	0.810819	0.565769
UNC1215	0.853539	0.98263	0.975344	1	1	0.968749	1	1	0.960906	0.933925	0.790546	1	1	0.831257	0.973345	1	0.840057	0.904024	1	1	0.940045	1	1	0.94481	0.974726	0.985099	1	0.974906	1	1	1	1
UNC1999	0.954207	0.972005	0.999199	0.992072	1	0.813567	0.975081	1	0.990444	0.971648	0.909184	0.90886	1	0.982107	0.919605	1	0.918557	0.898531	1	0.929902	1	0.957458	0.899726	1	0.967518	1	0.955705	0.971335	0.836446	1	1	1
Valproic Acid (sodium salt)	1	1	0.932892	0.858297	1	1	1	0.914795	1	0.964821	0.84941	0.961648	0.883432	0.986815	1	1	0.985469	0.911347	1	0.904542	1	1	0.950266	0.920267	1	1	0.992095	1	0.992557	0.92669	1	1
WDR5-0103	1	0.977181	0.983642	0.987606	0.994948	1	1	1	1	0.991301	0.924581	1	0.962034	1	0.982334	1	1	0.916048	1	0.996036	0.935002	1	1	0.946784	1	0.981065	1	0.976579	1	1	0.960525	0.994766
Zebularine	1	1	0.933401	0.942586	1	0.922001	0.984792	1	0.994336	0.987595	1	0.883643	0.797907	0.845299	1	1	1	0.980539	0.787961	0.90795	0.989779	0.986455	1	1	0.98001	1	1	1	0.949377	0.924011	1	0.96415

## Sheet: Supplementary Table S2
Compound	CH157	GAR	H23-3	IOMM Lee	J10-6	J11-2	J11-6	J11-7	J13-2	J15-4	J16-5	J17-2	J17-7	J18-6	J18-7	J19-2	J19-3	J19-4	J19-5	J19-6	J19-7	J2-2	J21-4	J21-5	J21-7	J4-1	J4-4	J7-6	J8-3	J8-4	J9-3	JEN
(-)-JQ1	0.460017	0.762497	0.641129	0.161684	0.0741806	0.877666	0.538091	0.352015	0.361661	0.0935565	0.423491	0.666478	0.0453981	0.00682385	0.271752	0.0193367	0.714109	0.788916	0.204759	0.18534	0.67251	0.845538	0.603153	0.516891	0.121157	0.460012	0.0532234	0.196025	0.950906	0.109431	0.942827	0.348136
(-)-Neplanocin A	0.0563117	0.440293	0.111254	0.000815336	0.0177687	0.734887	0.371982	0.758203	0.0416067	0.267496	0.600748	0.423477	0.019306	0.516888	0.413796	0.955054	0.735241	0.0806026	0.0279452	0.611978	0.12116	0.238342	0.478427	0.204759	0.337991	0.0964406	0.0242202	0.423477	0.139501	0.581764	0.62409	0.296289
(+)-Abscisic Acid	0.975442	0.72576	0.613584	0.286186	0.175572	0.131438	0.622322	0.0193047	0.415713	0.00474264	0.324584	0.829383	0.00614843	0.0590141	0.631891	0.0553309	0.0224542	0.121982	0.225609	0.0628964	0.39788	0.738808	0.627762	0.204759	0.0179245	0.102769	0.829844	0.295246	0.460012	0.0524551	0.213834	0.0536652
(+)-JQ1	0.0336614	0.563653	0.00979206	0.433662	0.371992	0.0964371	0.00380612	0.00380722	0.58116	0.229476	0.295261	0.622326	0.00462419	0.00370098	0.00370098	0.00370098	0.31035	0.0856108	0.0103355	0.323975	0.0166051	0.00202681	0.00218224	0.00370126	0.430078	0.558612	0.000983197	0.498238	0.00380685	0.0488196	0.00101261	0.27241
(R)-PFI-2 (hydrochloride)	0.185597	0.323369	0.0359454	0.864742	0.0126476	0.853458	0.116406	0.156755	0.296811	0.0191125	0.16597	0.355724	0.44154	0.204755	0.0208442	0.0131428	0.00877344	0.0103343	0.0680763	0.735237	0.875728	0.830274	0.98006	0.592357	0.516885	0.600741	0.189484	0.371987	0.677707	0.0875401	0.607177	0.330247
1-Naphthoic Acid	0.0847239	0.279545	0.307898	0.612016	0.0193035	0.460008	0.538091	0.829386	0.501672	0.0102497	0.281287	1	0.0421809	0.080605	0.899088	0.185344	0.225609	0.631888	0.631894	0.0355046	0.843622	0.991819	0.485274	0.0553329	0.0669898	0.248324	0.289859	0.87767	0.666481	0.0995682	0.542134	0.0228739
2-hexyl-4-Pentynoic Acid	0.441535	0.456989	0.0433982	0.3331	0.254693	0.781732	0.0163397	0.242083	0.0141841	0.40948	0.218191	0.734887	0.231468	0.0485378	0.225605	0.0153711	0.247932	0.463743	0.234907	0.573018	0.67251	0.543638	0.0940157	0.0590161	0.756571	0.829384	0.176321	0.538096	0.0453936	0.0266618	0.666659	0.54929
2-PCPA (hydrochloride)	0.901999	0.285141	0.785696	0.488715	0.441531	0.527979	0.600733	0.267763	0.522766	0.355939	0.498251	0.460008	0.0421809	0.225605	0.080605	0.0166051	0.00575085	0.28423	0.0792599	0.498828	0.843622	0.676833	0.545279	0.611984	0.44673	0.877671	0.623576	0.0163409	0.805469	0.0604069	0.0271558	0.495535
2,4-Pyridinedicarboxylic Acid	0.0126485	0.273303	0.448782	0.59172	0.339923	0.517968	1	0.6349	0.415713	0.00171638	0.0904347	0.156746	0.00674914	0.00575045	0.108211	0.0454129	0.185347	0.535275	0.0131435	0.0590121	0.310347	0.877767	0.25766	0.176168	0.714105	0.877671	0.321397	0.734887	0.558612	0.853462	0.376422	0.264751
2',3',5'-triacetyl-5-Azacytidine	0.987719	0.149623	0.847341	0.185021	0.0767064	0.405867	0.371982	0.355734	0.0107449	0.558906	0.689017	0.901997	0.102776	0.102161	0.13529	0.337995	0.682821	0.0424576	0.463751	0.0396682	0.821634	0.194287	0.737688	0.778095	0.843621	0.62233	0.266231	0.397224	0.666481	0.817407	0.260387	0.414136
3-amino Benzamide	0.517977	0.701608	0.534274	0.0304738	0.901998	0.689008	0.914195	0.0081105	0.0125509	0.00111021	0.201411	0.804968	0.00971421	0.108211	0.966283	0.932626	0.185347	0.297095	0.672512	0.310343	0.204755	0.361478	0.916396	0.592357	0.022452	0.0311688	0.785462	0.102765	0.423482	0.469418	0.276728	0.196269
3-Deazaneplanocin A	0.0288395	0.0813221	0.113662	0.000446057	0.196029	0.0421744	0.371982	0.805471	0.522766	0.126153	0.355739	0.450708	0.00674914	0.0087729	0.0908702	0.0112051	0.00370126	0.323975	0.413799	0.553989	0.0582221	0.0908406	0.0506403	0.672512	0.397877	0.254693	0.0943892	0.267753	0.662214	0.538108	0.260387	0.0682555
3-Deazaneplanocin A (hydrochloride)	0.478924	0.623369	0.199901	0.000890946	0.185592	0.0391526	0.517964	0.644252	0.249098	0.0648541	0.579505	0.00810917	0.0050893	0.00442412	0.693193	0.0224531	0.0518432	0.271748	0.573024	0.352391	0.735239	0.975461	0.269278	0.0103355	0.0669898	0.281277	0.00379584	0.950906	0.734889	0.758206	0.276728	0.308738
3,3'-Diindolylmethane	0.135425	0.390869	0.00979206	0.283409	0.0137874	0.031167	0.975441	0.558616	0.00580754	0.0566054	0.517982	0.397224	0.0115938	0.00527305	0.0396698	0.0908702	0.652074	0.382336	0.689412	0.69319	0.247928	0.0467367	0.324744	0.317115	0.516885	0.339923	0.771459	0.371987	0.926417	0.805473	0.878522	0.873418
4-iodo-SAHA	0.147938	0.290186	0.484439	0.000815336	0.355729	0.189996	0.734884	0.00887971	6.23183e-05	0.00977548	0.0741866	0.829383	0.0055963	0.23658	1	0.337995	0.271756	0.00626607	0.323983	0.714105	0.526039	0.114329	0.334665	0.0590161	0.756571	0.218182	0.00356053	0.102765	0.242078	0.0904347	0.00396909	0.167352
5-Azacytidine	0.0115929	0.390869	0.228533	0.0060811	0.71182	0.901997	0.0524453	0.558616	0.982568	0.0369239	0.975442	0.262437	0.064743	0.167328	0.489926	0.910251	0.821636	0.69319	0.284238	0.463743	0.38234	0.350789	0.838791	0.135293	0.631888	0.666481	0.912269	0.324559	0.655323	0.0363225	0.227345	0.577106
5-Methyl-2'-deoxycytidine	0.109427	0.175571	0.515286	0.219893	0.388707	0.689008	0.00462248	0.662217	0.0449995	0.00188324	0.579505	0.689008	0.123758	0.194872	0.67251	0.0153711	0.00877344	0.463743	0.321957	0.413792	0.553992	0.895781	0.624812	0.0629007	0.367173	0.371992	0.383027	0.926417	0.388707	0.405882	0.0646014	0.264751
5-Methylcytidine	0.371997	0.544314	0.115682	0.00610779	0.00810983	0.689008	0.0126458	0.135425	0.00110864	0.0427119	0.064743	0.758198	0.0384258	0.150661	0.413796	0.0208442	0.204759	0.498828	0.498835	0.843621	1	0.830274	0.00303407	0.016606	0.977518	0.633245	0.140923	0.460008	0.355729	0.405882	0.196283	0.415475
6-Thioguanine	0.00380722	0.0794546	0.022311	0.000815336	0.00380685	0.829383	0.450704	0.0563117	0.291782	0.59622	0.00811116	0.123746	0.00674914	0.00370098	0.00370098	0.00370098	0.0131435	0.048536	0.430085	0.121157	0.0241689	0.252956	0.025784	0.00370126	0.955054	0.829384	0.000851904	0.901997	0.131442	0.0904347	0.068726	0.00441637
a-Hydroxyglutaric Acid (sodium salt)	0.711822	0.841739	0.212346	0.391489	0.432447	0.0106146	0.600733	0.309688	0.650282	0.965145	0.139509	0.0488126	0.926419	0.297099	0.516888	0.0628986	0.921431	0.0193357	0.397884	0.745877	0.778094	0.0229374	0.876852	0.573024	0.516885	0.769939	0.528032	0.309678	0.388707	0.902	0.49597	0.0976873
AGK2	0.478924	0.945184	0.212346	0.336188	0.185579	0.0391526	0.00674684	0.938654	0.157147	0.670064	0.0904347	0.579493	0.0185234	0.0396698	0.253738	0.413796	0.236584	0.0153702	0.137606	0.0179245	0.693193	0.219992	0.444384	0.0193377	0.756571	0.423482	0.217957	0.109419	1	0.588279	0.168951	0.0573794
AGK7	0.109427	0.415147	0.392797	0.0895241	0.00740086	0.139496	0.165952	0.441535	0.0492495	0.0318182	0.734895	0.355724	0.147942	0.030015	0.553992	0.0121397	0.865733	0.0628964	0.150664	0.821633	0.573021	0.0649242	0.908135	0.032218	0.430078	0.0793083	0.233295	0.0711631	0.460012	0.0904347	0.0534367	0.132407
AK-7	0.622333	0.408995	0.795271	0.624811	0.0193035	0.295246	0.0193009	0.143601	0.0640667	0.00372585	0.0074021	0.829383	0.309693	0.0424593	0.352395	0.0396698	0.00370126	0.135287	0.137606	0.214994	0.323979	0.821002	0.916396	0.714109	0.013142	0.0524502	0.17	0.781732	0.666481	0.0177711	0.666659	0.683899
Anacardic Acid	0.254698	0.764157	0.0204216	0.916532	0.0847206	0.281272	0.109416	0.538104	0.755534	0.487862	0.579505	0.666478	0.0246261	0.0121397	0.102161	0.204755	0.405791	0.0370359	0.215974	0.236576	0.463747	0.130445	0.900548	0.544595	0.214994	0.558612	0.502171	0.281272	0.339923	0.139509	0.707542	0.46842
Apicidin	0.00380722	0.237273	0.0103573	0.000815336	0.388707	0.201397	0.405862	0.165965	0.109499	0.000292888	0.644256	0.254688	0.00614843	0.00370098	0.080605	0.756573	0.00370126	0.00370071	0.00404821	0.00370071	0.247928	0.00133051	0.117674	0.00483208	0.382336	0.12375	0.000792538	0.441526	0.00674799	0.469418	0.1119	0.00390863
BIX01294 (hydrochloride hydrate)	0.00380722	0.116675	0.00296468	0.0229153	0.185592	0.0847174	0.309673	0.00508884	0.0262056	0.110713	0.44154	0.281272	0.123758	0.38234	0.767309	0.0179254	0.247932	0.176161	0.276229	0.714105	0.799786	0.971502	0.956149	0.0485396	0.799785	0.975441	0.000792538	0.0106146	0.12375	0.579505	0.104016	0.343952
BML-210	0.175576	0.398769	0.0804721	0.549213	0.339923	0.558608	0.0647319	1	0.177278	0.0786004	0.196039	0.758198	0.2069	0.0142184	0.297099	0.030015	0.0142192	0.18534	0.799788	0.310343	0.297099	0.058303	0.480919	0.498835	0.0142177	0.324574	0.106834	0.242073	0.805469	0.600748	0.607177	0.190211
BRD73954	0.600745	0.83752	0.138472	0.110331	0.644249	0.889819	0.853456	0.644252	0.367441	0.114426	0.339933	0.0524477	0.267768	0.13529	0.573021	0.714107	0.0758397	0.352391	0.843623	0.535275	0.323979	0.0441678	0.135011	0.652074	0.553989	0.317066	0.351597	0.109419	0.0126476	0.00971421	0.177725	0.81297
Bromosporine	0.950907	0.344973	0.0831658	0.558101	0.355729	0.114909	0.229899	0.436133	0.296811	0.0389462	0.2069	0.0421744	0.281287	0.00442412	0.00370098	0.0454129	0.405791	0.672507	0.848417	0.535275	0.778094	0.00352824	0.213245	0.00442444	0.756571	0.218182	0.00949392	0.975441	0.00380685	0.0209555	0.33769	0.239119
BSI-201	0.185597	0.364763	1	0.00680198	0.0323918	0.498238	0.805465	0.460017	0.219066	0.00561613	0.975442	0.147929	0.0074021	0.00442412	0.214998	0.0553309	0.0590161	0.204752	0.652074	0.553989	0.498831	0.877767	0.0393443	0.102164	0.150657	0.0453936	0.249535	0.0209515	0.423482	0.0488196	0.590665	0.366628
Butyrolactone 3	0.388712	0.995013	0.0117557	0.0252305	0.00971269	0.711817	0.254683	0.267763	0.682047	0.403305	0.229919	0.963169	0.0336632	0.128074	0.0781892	0.943834	0.821636	0.516885	0.102418	0.048536	0.498831	0.0702859	0.202421	0.176168	0.121157	0.594841	0.383536	0.0453913	1	0.0600605	0.988914	0.818897
C646	0.102772	0.499955	0.020957	0.158021	0.579497	0.0819719	1	0.517977	0.551583	0.00106819	0.242088	0.148862	0.689017	0.0134941	0.428981	0.00683438	0.135181	0.151169	0.0150414	0.452121	0.194047	0.781901	0.486299	0.343555	0.0309276	0.309683	0.507348	0.254688	0.558612	0.00811116	0.895396	0.0132012
CAY10398	0.00380722	0.0832249	0.0112084	0.000852364	0.405872	0.196025	0.0363147	0.00419751	0.177278	0.124806	0.853462	0.206886	0.0563142	0.0087729	0.00370098	0.756573	0.00370126	0.225601	0.0424609	0.0166043	0.592354	0.0978743	0.0034526	0.135293	0.0908624	0.309683	0.000915372	0.156746	0.00380685	0.00971421	0.206077	0.0926271
CAY10591	0.196034	0.356112	0.496657	0.72921	0.0193035	0.950906	0.423472	0.538104	0.0640667	0.26281	0.781738	0.579493	1	0.0112051	0.67251	0.030015	0.00877344	0.516885	0.0131435	0.0963808	0.030015	0.543638	0.329679	0.498835	0.553989	0.295251	0.896401	0.975441	0.0741806	0.064743	0.0358952	0.304551
CAY10603	0.00380722	0.0706339	0.370467	0.000779805	0.62233	0.0163409	0.324554	0.0150179	0.000392577	0.000544927	0.829388	0.0163409	0.00674914	0.323979	0.735239	0.446734	0.00404821	0.00877236	0.32225	0.0103343	0.735239	0.592047	0.337175	0.297102	0.843621	0.388707	0.00274617	0.147929	0.0106154	0.853462	0.0730645	0.268442
CAY10669	0.405877	0.237273	0.560128	0.781458	0.841402	0.805467	0.853456	0.339928	0.588669	0.244638	0.711825	0.950906	0.0847271	0.0259972	0.413796	0.526039	0.247932	0.102159	0.135293	0.114539	0.821634	0.853572	0.688329	0.413799	0.236576	0.62233	0.688681	0.139496	0.170711	0.295261	0.200917	0.352701
CAY10683	0.229914	0.824893	0.487233	0.493784	0.175572	0.371977	0.441521	0.622333	0.0689204	0.0421556	0.102776	0.246604	0.517982	0.977518	0.0424593	0.0590141	0.526042	0.932626	0.042051	0.236576	0.26565	0.592047	0.166157	0.247932	0.204752	0.309683	0.157871	0.579493	0.405872	0.102776	0.666659	0.0400686
CBHA	0.295256	0.578008	0.0301701	0.0170414	0.62233	0.579493	0.355719	0.0391567	0.00507628	0.844107	0.064743	0.0453846	0.0115938	0.0193367	0.00442412	0.0553309	0.0259984	0.323975	0.0298538	0.0629868	0.13529	0.729839	0.948187	0.463751	0.0856108	0.218182	0.066811	0.212472	0.242078	0.975442	0.137083	0.00401082
CCG-100602	0.123754	0.326428	0.398197	0.517429	0.0115921	0.0453913	0.116406	0.355734	0.409482	0.291778	0.0177711	0.388702	0.0209555	0.0590141	1	0.284234	0.128077	0.843621	0.0590161	0.592351	0.977518	0.644509	0.269392	0.0629007	0.535275	0.139501	0.0962628	0.677704	0.689011	0.309693	0.971395	0.304551
Chidamide	0.0246246	0.227681	0.312529	0.0425349	0.355729	0.0106146	0.405862	0.0336614	0.367441	0.0416059	0.498251	0.758198	0.711825	0.0713023	0.204755	0.0142184	0.00370126	0.535275	0.0355077	0.271748	0.414107	0.170859	0.692915	0.14282	0.194869	0.196029	0.725916	0.901997	0.0137874	0.281287	0.55019	0.921941
CI-994	0.0311705	0.195714	0.490526	0.00185027	0.877671	0.600737	0.579489	0.0391567	0.00620767	0.425162	0.829388	0.517968	0.517982	0.080605	0.39788	0.23658	0.0501668	0.323975	0.225609	0.553989	0.39788	0.111998	0.551942	0.367181	0.0908676	0.517973	0.189484	0.00810917	0.00740086	0.00971421	0.820345	0.184291
Cl-Amidine (hydrochloride)	0.324579	0.408995	0.884187	0.107608	0.441531	0.185588	0.156742	0.758203	0.537078	0.113177	0.734895	0.894226	0.123758	0.430082	0.0279439	0.214998	0.13508	0.0628964	0.02417	0.0241677	0.259651	0.350789	0.0706368	0.821636	0.91025	0.901998	0.289859	0.441526	0.218182	0.600748	0.0710963	0.395491
coumarin-SAHA	0.734892	0.623369	0.0123266	0.0121036	0.302405	0.0227222	0.00971117	0.0669999	0.00731873	0.231601	0.0488196	0.380283	0.0055963	0.102161	0.00370098	0.142817	0.00370126	0.516885	0.0987919	0.00527269	0.00626649	0.0552089	0.0542891	0.0080745	0.142814	0.950906	0.000983197	0.0150158	0.758201	0.478928	0.284665	0.0778971
CPI-203	0.889822	0.459713	0.00296468	0.0478239	0.00380685	0.901997	0.0336558	0.00380722	0.191727	0.053155	0.00380759	0.185588	0.00614843	0.00370098	0.00370098	0.00370098	0.0080745	0.463743	0.611984	0.337991	0.553992	0.00639149	0.0040494	0.00370126	0.142807	0.0741806	0.0012156	0.026657	0.00380685	0.00419791	0.00673881	0.00674044
CPTH2 (hydrochloride)	0.829386	0.925301	0.821208	0.364809	0.218182	0.0256203	0.853456	0.116417	0.0524877	0.114425	0.498251	0.031167	0.00674914	0.0087729	0.0279439	0.0208442	0.114545	0.413792	0.756575	0.0396682	0.185344	0.659499	0.0665731	0.0208452	0.0166043	0.975441	0.0729923	0.12003	0.00971269	0.00462419	0.749287	0.302852
CUDC-101	0.0081105	0.143618	0.00923867	0.652684	0.355729	0.156746	0.281267	0.00380722	0.385119	0.0601127	0.950907	0.392699	0.372002	0.0628986	0.00742536	0.413796	0.00370126	0.0345538	0.0345567	0.323975	0.0420492	0.00352824	0.480919	0.0279452	0.821633	0.0904279	0.771221	0.00380649	0.12375	0.902	0.461473	0.0558984
Daminozide	0.460017	0.237273	0.534274	0.0671047	0.0336595	0.0600521	0.397204	0.538104	0.772198	0.00962167	0.0074021	0.267753	0.530801	0.756573	0.865732	0.259651	0.0553329	0.631888	0.00952596	0.382336	0.955054	0.659288	0.640455	0.128077	0.28423	0.116414	0.771221	0.139496	0.00614736	0.0693329	0.93332	0.3761
Decitabine	0.829386	0.80395	0.0546356	0.486033	0.371992	0.371987	0.0150148	0.00848663	0.0146206	0.26281	0.0177711	0.0227222	0.00811116	0.17469	0.00507153	0.00683438	0.00724734	0.151169	0.762117	0.374224	0.674573	0.06154	0.811108	0.6889	0.475954	0.355729	0.0831344	0.498238	0.758201	0.405882	0.646573	0.0563868
Delphinidin (chloride)	0.0453958	0.278057	0.953537	0.0748058	0.388707	0.538096	1	1	0.714384	0.978211	0.254703	0.829383	0.0126495	0.13529	0.0279439	1	0.016606	0.0300137	0.0806075	0.955054	0.735239	0.781901	0.978081	0.352399	0.214994	0.579497	0.331269	0.938653	0.0904279	0.689017	0.32116	0.72995
DMOG	0.498247	0.965564	0.744097	0.0536551	0.0377119	0.161297	0.734884	0.734892	0.0461811	0.14472	0.267768	0.441526	0.196039	0.0121397	0.67251	0.142817	0.714109	0.158826	0.848417	0.0713001	0.185344	0.0522528	0.667273	0.481118	0.932626	0.441531	0.152058	0.206871	0.355729	0.0693329	0.607177	0.641531
Ellagic Acid	0.185597	0.725759	0.0924942	0.706874	0.877671	0.147929	0.00559431	0.0209542	0.678044	0.33363	0.805473	0.0106146	0.00614843	0.463747	0.030015	0.102161	0.167331	0.932626	0.0279452	0.0095248	0.573021	0.512497	0.244136	0.00442444	0.352391	0.432447	0.19982	0.805467	0.901998	0.644256	0.922517	0.181673
EPZ005687	0.218186	0.427612	0.524693	0.229304	0.498242	0.152285	0.853456	0.0773274	0.603818	0.379167	0.829388	0.10642	0.711825	0.767309	0.23658	0.310347	0.0224542	0.573018	0.476202	0.397877	0.0590141	0.895783	0.344778	0.430085	0.102159	0.600741	0.673991	0.600737	0.069327	0.44154	0.8349	0.754344
EPZ5676	0.975442	0.783146	0.557938	0.62624	0.371992	0.274451	0.622322	0.538104	0.973855	0.000544927	0.44154	0.242073	0.405882	0.297099	0.693193	0.0553309	0.966283	0.049583	0.215002	0.69319	0.337995	0.00910975	0.825913	0.0131435	0.91025	0.309683	0.302233	0.380283	0.950906	0.0115938	0.58789	0.0191262
Etoposide	0.498247	0.926904	0.0719277	0.286186	0.950906	0.355724	0.78173	0.0793114	0.165313	0.240235	0.975442	0.355724	0.805473	0.977518	0.977518	0.13529	0.0629007	0.352391	0.0121404	0.00807349	0.430082	0.608613	0.525531	0.0224542	0.310343	0.0453936	0.179544	0.829383	0.0126476	0.0964475	0.260387	0.536442
EX-527	0.102772	0.495677	0.186609	0.145354	0.324574	0.109419	0.079302	0.185597	0.304462	0.0162426	0.902	0.689008	0.975442	0.0179254	0.821634	0.102161	0.0068243	0.0806026	0.00575085	0.553989	0.323979	0.0721538	0.262832	0.158832	0.225601	0.644249	0.428786	0.711817	0.644249	0.131451	0.55019	0.0294538
F-Amidine (trifluoroacetate salt)	0.0311705	0.344973	0.697695	0.17698	0.62233	0.0318468	0.877669	0.558616	0.428342	0.454257	0.156759	0.470429	0.175581	0.92143	0.0166051	0.12116	0.535281	0.0424576	0.271756	0.323975	0.652071	0.689243	0.353081	0.535281	0.430078	0.975441	0.101008	0.666478	0.558612	0.339933	0.558088	0.221918
Garcinol	0.711822	0.797741	0.613584	0.0125326	0.388707	0.128626	0.666475	0.666485	0.00202738	0.147754	0.281287	0.218177	0.0421809	0.0856133	0.13529	0.592354	0.397884	0.18534	0.516891	0.194869	0.337995	0.38346	0.825913	0.359738	0.12807	0.0847206	0.896401	0.0603988	0.261164	0.55862	0.10661	0.489954
Gemcitabine	0.00380722	0.742015	0.0359454	0.0947839	0.0421766	0.00380649	0.00380612	0.00380722	8.58748e-05	0.000751017	0.00380759	0.11641	0.00462419	0.00370098	0.367177	0.00370098	0.00370126	0.00442381	0.00370126	0.00404762	0.00370098	0.00512326	0.000196031	0.00370126	0.397877	0.254693	0.000851904	0.0299804	0.00380685	0.00380759	0.00196311	0.348136
GSK-J1 (sodium salt)	0.175576	0.290186	0.846006	0.809996	0.12375	0.711817	0.0563039	0.135425	0.848385	0.00756102	0.0504271	0.355724	0.185601	0.0713023	0.0322167	0.39788	0.31035	0.310343	0.0224542	0.337991	0.498831	0.674201	0.798772	0.204759	0.430078	0.689011	0.452529	0.498238	0.829384	0.131451	0.141511	0.357307
GSK-J2 (sodium salt)	0.262448	0.742015	0.272497	0.0947839	0.156751	0.805467	0.6777	0.0288395	0.038433	0.217023	0.0847271	0.734887	0.185601	0.0590141	0.247928	0.735239	0.0068243	0.756571	0.00877344	0.0908676	0.778094	0.0578438	0.520291	0.128077	0.0193357	0.218182	0.960058	0.527979	0.152289	0.00888042	0.173002	0.357307
GSK-J4 (hydrochloride)	0.0647402	0.312906	0.134791	0.887244	0.62233	0.569	0.0391505	0.154295	0.109499	0.978211	0.355739	0.538096	0.644256	0.259651	0.413796	0.592354	0.810692	0.12807	0.259655	0.69319	0.903189	0.107445	0.474719	0.693195	0.0396682	0.131442	0.992008	0.622326	0.975441	0.0717231	0.0224321	0.501151
GSK-LSD1 (hydrochloride)	0.877672	0.721714	0.984505	0.304166	0.00740086	0.579493	0.877669	0.102772	0.028359	0.00708297	0.622337	0.924338	0.478928	0.108211	0.843622	0.0103349	0.00626691	0.592351	0.215002	0.430078	0.154701	0.10792	0.104248	0.0713046	0.821633	0.600741	0.0297435	0.0453913	0.00419712	0.0847271	0.0606833	0.811122
GSK126	0.123754	0.685671	0.45631	0.063506	0.666481	0.355724	0.568996	0.92434	0.714385	0.00312559	0.423491	0.498238	0.355739	0.00742536	0.438359	0.128074	0.821636	0.367173	0.169839	0.204752	0.631891	0.322964	0.929942	0.553995	0.553989	0.829384	0.428786	0.950906	0.734889	0.517982	0.770447	0.00162119
GSK2801	0.460017	0.278057	0.933294	0.796207	0.71182	0.0453913	0.0177663	0.131446	0.355941	0.0196794	0.829388	0.711817	0.0311723	0.214998	0.0856133	0.0485378	0.225609	0.382336	0.198165	0.430078	0.590117	0.933567	0.113056	0.194876	0.69319	0.71182	0.230916	0.0115912	0.102769	0.877674	0.646573	0.776998
GSK343	0.0177699	0.595214	0.0178146	0.178224	0.309683	0.339918	0.079302	0.662217	0.22319	0.0247676	0.0421809	0.950906	0.926419	0.0087729	0.209828	0.367177	0.00575085	0.317107	0.0629007	0.114539	0.735239	0.784169	0.730159	0.932627	0.91025	0.926417	0.104672	0.388702	0.0055953	0.0604069	0.867576	0.94355
GSK4112	0.206895	0.220574	0.573279	0.59172	0.644249	0.87767	0.267748	0.339928	0.0427127	0.317502	0.0604069	0.975441	0.0209555	0.00742536	0.413796	0.323979	0.0713046	0.799785	0.0485396	0.167325	0.516888	1	0.670913	0.778095	0.0193357	0.644249	0.203358	0.569	0.853459	0.00888042	0.46593	0.425686
HC Toxin	0.00380722	0.116675	0.00979206	0.00364383	0.008879	0.865547	0.00380612	0.00380722	0.000134463	0.00028076	0.00380759	0.0391526	0.00380759	0.00370098	0.00370098	0.00370098	0.00370126	0.00575006	0.00404821	0.00370071	0.00370098	0.00284747	0.000639805	0.00370126	0.0518394	0.388707	0.000792538	0.00380649	0.00380685	0.734895	0.000853573	0.0181455
HNHA	0.853461	0.361765	0.446253	0.916532	0.0336595	0.5483	0.355719	0.901999	0.934699	0.0091732	0.355739	1	0.0163442	0.498831	0.0142184	0.0518413	0.190064	0.535275	0.804551	0.0908676	0.621899	0.848752	0.355084	0.14282	1	0.781734	0.771457	0.309678	0.781734	0.0904347	0.478552	0.255459
HPOB	0.781736	0.347736	0.331582	0.296474	0.0453936	0.0246216	0.0421723	0.423486	0.00756126	0.105912	0.324584	0.109419	0.123758	0.080605	0.214998	0.0259972	0.016606	0.69319	0.180907	0.516885	0.284234	0.952521	0.741462	0.02417	0.225601	0.950906	0.100456	0.339918	0.975441	0.0227265	0.728314	0.264751
I-BET151	0.00674857	0.944071	0.124952	0.505533	0.371992	0.175567	1	0.405877	0.00413467	0.822793	0.877674	0.0904246	0.0137894	0.0131428	0.00370098	0.0908702	0.0454146	0.0396682	0.652074	0.535275	0.284234	0.00304425	0.474719	0.00575085	0.236576	0.196029	0.00113302	0.00614682	0.00380685	0.00419791	0.169267	0.078177
I-BET762	0.0126485	0.623369	0.000324188	0.533512	0.62233	0.0150158	0.0288345	0.00380722	0.00917374	0.157145	0.0055963	0.734887	0.0055963	0.00015751	0.00196551	6.50385e-05	0.674571	0.140354	0.343357	0.992209	0.807141	0.00700417	3.48602e-05	5.51227e-05	0.395586	0.309683	0.00210547	0.0246216	0.00380685	0.0227265	0.00428067	0.296289
I-CBP112 (hydrochloride)	1	0.608185	0.237928	0.0041481	0.600741	0.423477	0.388697	0.622333	0.650282	0.403305	0.666488	0.324569	0.622337	0.735239	0.977518	0.271752	0.446738	0.481111	0.215974	0.271748	0.259651	0.0666718	0.387156	0.135293	0.150657	0.781734	0.257711	0.102765	0.758201	0.175581	0.226697	0.0447233
IOX1	0.0847239	0.297633	0.891859	0.0344677	0.901998	0.689008	0.0311652	0.0266602	0.772198	0.361661	0.388717	1	0.00674914	0.0424593	0.778094	0.876826	0.611984	0.0166043	0.0121404	0.573018	0.865732	0.0423378	0.632613	0.535281	0.367173	0.254693	0.146409	0.734887	0.517973	0.0336632	0.261198	0.339116
Isoliquiritigenin	0.894229	0.263963	0.303315	0.566418	0.0150169	0.644245	0.120026	0.622333	0.191727	0.818545	0.600748	0.954559	0.019306	0.00682385	0.00575045	0.146695	0.158832	0.075835	0.799788	0.516885	0.247928	0.959113	0.0911078	0.215002	0.367173	0.116414	0.0166729	0.185588	0.689011	0.622337	0.62409	0.46797
ITF 2357	0.261169	0.965101	0.0122313	0.0334295	0.71182	0.196025	0.0693212	0.0847239	0.00243286	0.991284	0.498251	0.901997	0.0115938	0.323979	0.0131428	0.592354	0.00370126	0.382336	0.693195	0.310343	0.887947	0.00512326	0.62422	0.158832	0.662254	0.600741	0.00196833	0.666478	0.805469	0.478928	0.607275	0.00462092
JGB1741	0.622333	0.544314	0.815714	0.762591	1	0.206886	0.267748	0.309688	0.596222	0.355939	0.469418	0.355724	0.0563142	0.330935	0.481115	0.516888	0.0259984	0.323975	0.0856158	0.142814	0.0590141	0.572797	0.46245	1	0.977518	0.579497	0.0149368	0.223981	0.460012	0.44154	0.0433822	0.495535
JIB-04	0.0193047	0.129415	0.0846645	0.0325571	0.0377119	0.00380649	0.355719	0.734892	0.0580377	4.939e-05	0.579505	0.165956	0.0391587	0.00370098	0.821634	0.00370098	0.00370126	0.00370071	0.00742583	0.00370071	0.00370098	0.438909	0.00109777	0.0080745	0.69319	0.388707	0.341336	0.00614682	0.00971269	0.00380759	0.177725	0.385721
LAQ824	0.00380722	0.116675	0.00313037	0.000547706	0.00380685	0.423477	0.147925	0.00380722	3.72306e-05	0.000351922	0.00380759	0.00614682	0.00380759	0.00370098	0.00370098	0.00370098	0.00370126	0.00370071	0.00370126	0.00370071	0.00370098	0.00352824	8.01263e-05	0.00370126	0.176161	0.829384	0.000792538	0.87767	0.00380685	0.00380759	0.00368416	0.232128
Lestaurtinib	0.405877	0.76893	0.00296468	0.180968	0.781734	0.0421744	0.267748	0.206895	0.000160368	0.27463	0.0137894	0.317061	0.0074021	0.00370098	0.00370098	0.00370098	0.00370126	0.00877236	0.0355077	0.00370071	0.0370374	0.00352824	0.00588148	0.00370126	0.0142177	0.950906	0.000792538	0.711817	0.0227236	0.527992	0.0982333	0.818897
Lomeguatrib	0.324579	0.638716	0.321926	0.391489	0.517973	0.914196	0.175563	0.423486	0.150837	0.00178141	0.281287	0.0563065	0.0074021	0.194872	0.102161	0.887947	0.00575085	0.337991	0.535281	0.382336	0.0963835	0.322964	0.79106	0.887948	0.0142177	0.841402	0.992008	0.711817	0.339923	0.0288412	0.309638	0.446543
M 344	0.00380722	0.116675	0.0135426	0.068966	0.734889	1	0.644242	0.0391567	0.626865	0.000579015	0.0266618	0.267753	0.00888042	0.310347	0.00404792	0.0856133	0.00404821	0.135287	0.02417	0.0142177	0.158829	0.0954819	0.545279	0.0103355	0.756571	0.644238	0.000915372	0.254688	0.0847206	0.309693	0.00479277	0.0371994
MC 1568	0.242083	0.631023	0.344241	0.762591	0.829384	0.498238	0.102762	0.295256	0.658167	0.0318182	0.478928	0.109419	0.538108	0.102161	0.367177	0.142817	0.397884	1	0.204759	0.0553289	0.259651	0.802531	0.398228	0.631894	0.310331	0.689011	0.725916	0.0563065	0.405872	0.488534	0.478552	0.0058657
Methylstat (hydrate)	0.622333	0.978474	0.285433	0.187073	0.0741806	0.00674742	0.644242	0.0177699	0.755534	0.000269103	0.758206	1	0.0453981	0.0131428	0.00575045	0.955054	0.693195	0.977518	0.128077	0.337991	0.756573	0.861623	0.838791	0.0629007	0.075835	0.71182	0.0831344	0.0563065	0.877671	0.0604069	0.062232	0.395491
MI-2 (hydrochloride)	0.116417	0.216534	0.414665	0.0324181	0.781734	0.267753	0.805465	0.112876	0.603818	0.960791	0.0194812	0.0693241	0.877674	0.865732	0.446734	0.652071	0.778095	0.735237	0.0279452	0.271748	0.662256	0.454159	0.0810443	0.932627	0.247924	0.901998	0.90433	0.11641	0.781734	0.0266618	0.857709	0.84561
MI-nc (hydrochloride)	0.00380722	0.0706339	0.795271	0.000779805	0.218182	0.254688	0.347754	0.0126485	0.240238	0.370349	0.0246261	0.026657	0.0055963	0.92143	0.00575045	0.843622	0.00483208	0.507811	0.724647	0.367173	0.284234	0.311442	0.110801	0.382344	0.0166043	0.423482	0.00139768	0.031167	0.0209528	0.0115938	0.381372	0.0636526
Mirin	0.689014	0.252687	0.782385	0.463179	0.805469	0.853458	0.309673	0.218186	0.0301186	0.0511709	0.55862	0.0246216	0.16597	0.297099	0.242203	0.214998	0.0758397	0.352391	0.692151	0.0179245	0.303671	0.328826	0.135011	0.150664	0.582644	0.853459	0.458576	0.711817	0.579497	0.689017	0.31043	0.171892
MS-275	0.00380722	0.095412	0.782385	0.000852364	0.106051	0.498238	0.644242	0.00740148	0.0374219	0.000146869	0.711825	0.975441	0.805473	0.899088	0.102161	0.030015	0.0080745	0.544589	0.102418	0.652069	0.214998	0.186229	0.480919	0.00952596	0.0856108	0.817404	0.102549	0.558608	0.309683	0.242088	0.23758	0.176732
N-Oxalylglycine	0.926418	0.356112	0.129777	0.955753	0.600741	0.388702	0.926416	0.734892	0.788967	0.965145	1	0.0647346	0.317076	0.0396698	0.0485378	0.0908702	0.032218	0.44673	0.0249918	0.44673	0.756573	0.543638	0.722655	0.0908728	0.176161	0.689011	0.912269	0.242073	0.926417	0.116447	0.186833	0.213486
Nicotinamide	0.0563117	0.608185	0.496657	0.781458	0.00674799	0.441526	0.734884	0.926418	0.698148	0.074071	0.758206	0.538096	0.0964475	0.0103349	0.297099	0.0590141	0.185347	0.573018	0.317115	0.498828	0.150661	1	0.679573	0.102164	0.932626	0.196029	0.735889	0.123746	0.666481	0.517982	0.192627	0.395491
Octyl-a-ketoglutarate	0.0177699	0.216534	0.976759	0.280652	0.165961	0.558608	0.441521	0.254698	0.180812	0.172071	0.175581	0.0524477	0.0074021	0.0518413	0.337995	0.271752	0.150664	0.535275	0.397884	0.0310964	0.910251	0.885857	0.845431	0.176168	0.171697	0.165961	0.521502	0.317061	0.644249	0.0115938	0.675695	0.3761
OTX015	0.0583255	0.307759	0.102645	0.779295	0.12375	0.0150158	0.829381	0.00462376	0.296811	0.926015	0.0524551	0.746511	0.16597	0.00370098	0.00370098	0.0087729	0.413799	0.217303	0.865733	0.0424576	0.337995	0.0229374	0.0109475	0.00370126	0.0179245	0.0209528	0.0126311	0.538096	0.00380685	0.0693329	0.00569119	0.489954
Oxamflatin	0.00380722	0.116675	0.00721414	0.0148864	0.644249	0.460008	0.185583	0.0563117	0.441192	0.00021732	0.65533	0.190749	0.0391587	0.0259972	0.00370098	0.0963835	0.00404821	0.44673	0.59012	0.0095248	0.498831	0.194287	0.444384	0.0629007	0.631888	0.0904279	0.0012156	0.281272	0.0904279	0.0055963	0.396671	0.0516318
Panobinostat	0.00380722	0.104303	0.00296468	0.00290475	0.00380685	0.139496	0.00380612	0.00380722	3.72306e-05	0.000112531	0.00380759	0.00380649	0.00380759	0.00370098	0.00370098	0.00370098	0.00370126	0.00370071	0.00370126	0.00370071	0.00370098	0.00352824	5.03503e-05	0.00370126	0.00370071	1	0.000792538	0.781732	0.00380685	0.339933	0.00368416	0.202463
PCI 34051	0.460017	0.733872	0.586574	0.549844	0.938654	0.734887	0.123742	0.901999	0.00291135	0.00947021	0.102776	0.581752	0.0741866	0.0370374	0.563464	0.323979	0.0908728	0.035775	0.204759	0.337991	0.778088	1	0.798772	0.955055	0.2422	0.0170411	0.817804	0.355724	0.388707	0.689017	0.675695	0.0494219
PFI-1	0.0421787	0.662027	0.0109515	0.936123	0.805469	0.295246	0.0647319	0.460017	0.195471	0.19547	0.805473	0.309678	0.00971421	0.167328	0.463747	0.446734	0.176168	0.367173	0.0485396	0.843621	0.67251	0.0346683	0.119936	0.0571478	0.821633	0.0964406	0.0905092	0.0299804	0.405872	0.00380759	0.141511	0.32153
PFI-3	0.538104	0.213553	0.0404625	0.0460826	0.309683	0.558608	0.0115903	0.0488173	0.0486227	0.0119823	0.0363225	0.498238	0.185601	0.080605	0.843622	0.0259972	0.0179263	0.0806026	0.0273296	0.225601	0.887947	0.124498	0.916396	0.0396714	0.0628964	0.441531	0.489497	1	0.405872	0.324584	0.428359	0.343606
Phthalazinone pyrazole	0.926418	1	0.145219	0.0121036	0.0793083	0.734887	0.558604	0.950907	0.116957	0.138797	0.324584	0.689008	0.242088	0.00370098	0.481108	0.463747	0.0345567	0.430078	0.535281	0.382336	0.544592	0.518302	0.151528	0.167331	0.0289609	0.71182	0.435812	0.0177675	0.517973	0.44154	0.0278553	0.0138708
Piceatannol	0.0604042	0.586582	0.0771654	0.877723	0.0421766	0.734887	0.00971117	0.517977	0.197363	0.157145	1	0.734887	0.877674	0.00952538	0.843622	0.247928	0.367181	0.735237	0.194876	0.0590121	0.244337	0.194287	0.964116	0.117814	0.135287	0.0363186	0.786826	0.206886	0.0177687	0.267768	0.0982333	0.750001
Pimelic Diphenylamide 106	0.590075	0.541992	0.436323	0.0876967	0.5381	0.0741775	0.0904212	0.889822	0.0853198	0.00466238	0.0363225	0.0488126	0.281287	0.0121397	0.932626	0.066992	0.247932	0.150657	0.519965	0.955054	0.778094	0.262977	0.459411	0.352399	0.352391	0.355729	0.146409	0.254688	0.644249	0.853462	0.58789	0.00463277
Pyroxamide	0.0524526	0.12671	0.344241	0.0244372	0.0524502	0.0995576	0.309673	1	0.173795	0.00256812	0.600748	0.0550604	0.324584	0.297099	0.446734	0.194872	0.0142192	0.843621	0.165813	0.204752	0.843622	0.10792	0.512572	0.150664	0.0713001	0.829384	0.00210547	0.156746	0.0193035	0.392715	0.045407	0.138704
RG-108	0.805471	0.334058	0.782385	0.486033	0.0421766	0.212472	0.371982	0.734892	0.558908	0.0656512	0.460022	0.689008	0.689017	0.413796	0.652071	0.13529	0.943835	0.225601	0.367181	0.0806026	0.066992	0.876973	0.806503	0.0908728	0.498828	0.781734	0.405784	0.853458	0.309683	0.44154	0.164684	0.795255
RGFP966	0.339928	0.453187	0.361337	0.151527	0.00810983	0.355724	0.00614629	0.309688	0.0284969	0.00685428	0.16597	0.950906	0.44154	0.0856133	0.0485378	0.0142184	0.0279452	0.573018	0.631894	0.481111	0.0758374	0.69434	0.538655	0.0279452	0.799785	0.758201	0.302233	0.853458	0.579497	0.460022	0.428359	0.221918
RSC-133	0.267763	0.527842	0.236127	0.529467	0.0421766	0.242073	0.711814	0.711822	0.986926	0.165311	0.877674	0.600737	0.711825	0.0279439	0.0241689	0.0518413	0.00404821	0.303667	0.631894	0.631888	0.0963835	0.211166	0.802635	0.176168	0.0424576	0.0363186	0.125409	0.666478	0.558612	0.666488	0.469966	0.0168583
Rucaparib (phosphate)	0.254698	0.750187	0.437236	0.0304738	0.508053	0.123746	0.0563039	0.0193047	0.00888532	0.00631123	0.229919	0.423477	0.00811116	0.00742536	0.413796	0.0153711	0.02417	0.821633	0.0068243	0.367173	0.955054	0.366895	0.250794	0.284238	0.121157	0.805469	0.146409	0.0847174	0.901998	0.0050893	0.746905	0.304551
RVX-208	0.00462376	0.310325	0.782385	0.985244	0.218182	0.0741775	0.0137854	0.478924	0.58116	0.991284	0.324584	0.441526	0.44154	0.516888	0.0121397	0.0279439	0.0103355	0.573018	0.794368	0.0553289	0.142817	0.238431	0.00818494	0.553995	0.323975	0.508053	0.145977	0.281272	0.0421766	0.131451	0.749287	0.804266
S-(5'-Adenosyl)-L-methionine (tosylate)	0.901999	0.79145	0.206273	0.62624	0.579497	0.853458	0.423472	0.147938	0.588669	0.759689	0.0793146	0.11641	0.355739	0.167328	0.631891	1	0.0992389	0.498828	0.259655	0.47238	0.337995	0.0885905	0.403833	0.631894	0.382336	0.644249	0.616507	0.805467	0.295251	0.950907	0.11319	0.0728852
S-Adenosylhomocysteine	0.0055958	0.282867	0.119509	0.809996	0.339923	0.0933886	0.00508746	0.026266	0.422	0.814302	0.229919	0.805467	0.175581	0.367177	0.337995	0.0495849	0.00527342	0.887946	0.741288	0.0454111	0.142817	0.248049	0.0727246	0.413799	0.887946	0.147934	0.507348	0.87767	0.0453936	0.975442	0.944612	1
SAHA	0.00380722	0.116675	0.0121318	0.003782	0.339923	0.0647346	0.295241	0.498247	0.0068545	0.000318632	0.0524551	0.498238	0.0524551	0.00255056	0.00329103	0.0176533	5.51227e-05	0.0266499	0.311463	0.0543985	0.837527	0.136611	0.0241408	0.0340977	0.0874832	0.781734	0.000792538	0.0126467	0.530792	0.355739	0.988914	0.208808
Salermide	0.423486	0.684533	0.218547	0.537571	0.388707	1	0.538091	0.432452	0.370823	0.0749591	0.295261	0.450708	0.758206	0.652071	0.714107	0.337995	0.111341	0.382336	0.0806075	0.0370359	0.430082	0.504858	0.357691	0.0908728	0.28423	0.175572	1	0.0288362	0.829384	0.0050893	0.182233	0.236818
SB939	0.00380722	0.0706339	0.0187721	0.000815336	0.0453936	0.355724	0.0421723	0.0266602	0.0125509	0.00450565	0.16597	0.0106146	0.0050893	0.0485378	0.446734	0.413796	0.00370126	0.00370071	0.194876	0.00877236	0.778094	0.00232478	0.415188	0.00370126	0.025996	0.498242	0.000792538	0.00810917	0.558612	0.218191	0.0015377	0.00390863
Scriptaid	0.460017	0.935484	0.414665	0.0412927	0.950906	0.441526	0.295241	0.0209542	0.0873222	0.135906	0.109431	0.478914	0.218191	0.446734	0.00807399	0.259651	0.00370126	0.247924	0.176168	0.025996	0.337995	0.0987797	0.00473841	0.330939	0.553989	0.689011	0.992008	0.229904	0.116414	0.0524551	0.00230411	0.00462092
SGC-CBP30	0.0647402	0.845962	0.0289754	0.378004	0.72332	0.175567	0.460003	0.156755	0.508653	0.634628	0.478928	0.218177	0.116421	0.111466	0.53844	0.792053	0.769568	0.428978	0.155221	0.50046	0.674573	0.512497	0.936503	0.406545	0.646276	0.478919	0.502171	0.758198	0.147934	0.0311723	0.878522	0.25546
SGC0946	0.0055958	0.396856	0.592175	0.62624	0.0421766	0.00740024	0.0246201	0.114917	0.0416067	0.379167	0.00462419	0.718184	0.267768	0.693193	0.39788	0.0279439	0.00442444	0.0241677	0.0987919	0.0518394	0.339224	1	0.00504252	0.592357	0.821633	1	0.718425	0.460008	0.0209528	0.295261	0.513721	0.249882
SGI-1027	0.0266602	0.569493	0.156254	0.0438084	0.558612	0.734887	0.324564	0.758203	0.58116	0.926015	0.478928	0.781732	0.156759	0.284234	0.066992	0.535278	0.290618	0.535275	0.176168	0.0518394	0.592354	0.797692	0.13359	0.910252	0.614319	0.865548	0.508571	0.267753	0.758201	0.0363225	0.236682	0.0796865
Sinefungin	0.131446	0.168789	0.251505	0.388306	0.498242	0.0163409	0.622322	0.00508884	0.222742	0.00261479	0.805473	0.460008	0.423491	0.535278	0.0454129	0.0142184	0.00370126	0.0345538	0.535281	0.887946	0.498831	0.625376	0.305483	0.693195	0.430078	0.405872	0.588597	0.0115912	0.262442	0.147942	0.988914	0.249882
SIRT1/2 Inhibitor IV	0.0163431	0.995694	0.40731	0.716061	0.62233	0.0964371	0.517964	0.116417	0.848385	0.103574	0.309693	0.781732	0.711825	0.271752	0.204755	0.247928	0.0713046	0.778092	0.32225	0.367173	0.367177	0.359176	0.216944	0.105152	0.516885	0.478919	0.196331	0.0793052	0.261164	0.0074021	0.531797	0.0778971
Sirtinol	0.423486	0.520755	0.60001	0.985244	0.877671	0.0246216	0.371982	0.469413	0.70625	0.000409146	0.131451	0.666478	0.00674914	0.39788	0.0628986	0.430082	0.463751	0.0300137	0.865733	0.150657	0.23658	0.558922	0.385292	1	0.209824	0.0847206	0.960058	1	0.332186	0.853462	0.857709	0.0943564
Sodium 4-Phenylbutyrate	0.67771	0.268605	0.586574	0.00563953	0.0106154	0.371987	0.19602	0.165965	0.722553	0.00275934	0.954561	0.281272	0.109431	0.00742536	0.030015	0.337995	0.573024	0.225601	0.0518432	0.167325	0.932626	0.0679837	0.632613	0.0485396	0.413792	0.460012	0.217957	0.405867	0.388707	0.423491	0.39608	0.27241
Sodium Butyrate	0.853461	0.384937	0.361591	0.0521443	0.5381	0.242073	0.295241	0.432452	0.0498836	0.698146	0.0964475	0.781725	0.0106171	0.714107	0.0370374	0.066992	0.788919	0.44673	0.0345567	0.0628964	0.066992	0.659499	0.512572	0.00952596	0.102159	0.441531	0.362051	0.11641	0.0177652	0.600748	0.58789	0.872665
Splitomicin	0.478924	0.978474	0.022311	0.0947839	0.267758	0.0563065	0.600733	0.469413	0.116957	0.793174	0.229919	0.0363166	0.00674914	0.0224531	0.767309	0.102161	0.14282	0.0469499	0.0987919	0.0166043	0.516888	0.830274	0.597842	0.0553329	0.756571	0.62233	0.771459	0.723317	0.0904279	0.77572	0.878522	0.295745
Suramin (sodium salt)	0.0563117	0.25037	0.573279	0.229304	0.0266586	0.432442	0.975441	0.096444	0.986926	0.020857	0.498251	0.711817	0.302415	0.0121397	0.756573	0.0758374	0.932627	0.843621	0.0669942	0.553989	0.150661	0.625381	0.67222	0.0669942	0.535275	0.281277	0.054468	0.0391526	0.363799	0.405882	0.615655	0.339116
Tenovin-1	0.242083	0.985039	0.357201	0.906755	0.0311688	0.590067	0.218172	0.096444	0.322823	0.00275934	0.147942	0.975441	0.0246261	0.463747	0.0179254	0.150661	0.124579	0.413792	0.128077	0.323975	0.0518413	0.608613	0.403834	0.0963862	0.247924	0.80497	1	0.0363166	0.0904279	0.829388	0.0848945	0.516513
Tenovin-6	0.281282	0.905465	0.3979	0.869492	0.758201	0.388702	0.633238	0.0647402	0.0924939	0.0873209	0.622337	0.901997	0.064743	0.26565	0.0208442	0.080605	0.150664	0.977518	0.0396714	0.194869	0.0713023	0.0721538	0.291545	0.14282	0.0590121	0.0193035	0.81003	0.478914	0.0604015	0.254703	0.900482	0.156726
trans-Resveratrol	0.152294	0.987083	0.3979	0.916532	0.579497	0.156746	0.347754	0.805471	0.566279	0.382134	0.254703	0.371987	0.423491	0.0131428	0.799786	0.108211	0.0370389	1	0.887948	0.714105	0.185344	0.163539	0.230254	0.903189	0.463743	0.371992	0.666693	0.769936	0.865548	0.302415	0.900482	0.171892
Trichostatin A	0.00380722	0.0932869	0.00296468	0.0355333	0.926417	0.769936	0.131434	0.0193047	0.682047	0.361661	0.109431	0.242073	0.00888042	0.00575045	0.0166051	0.352395	0.00370126	0.048536	0.0142192	0.0068234	0.778094	0.00352824	0.0727246	0.00877344	0.0424576	0.926417	0.000792538	0.131438	0.0246231	0.00888042	0.160506	0.0136946
Tubacin	0.0081105	0.152697	0.331582	0.208275	0.339923	0.102765	0.853456	0.0215487	0.917341	0.0053399	0.281287	0.689008	0.55862	0.367177	0.0518413	0.158829	0.00877344	0.225601	0.535281	0.397877	0.930766	0.170859	0.900548	0.135293	0.631888	0.758201	0.833404	0.324569	0.405872	0.372002	0.272341	0.632681
Tubastatin A	0.00508884	0.323369	0.847341	0.165411	0.175572	0.00419672	0.0106138	0.131446	0.177278	0.772197	0.388717	0.579493	0.0604069	0.821634	0.310347	0.0345553	0.0259984	0.225601	0.204759	0.025996	0.38234	0.543638	0.0267978	0.714109	0.337991	0.254693	0.735889	0.324569	0.00508838	0.423491	0.728314	0.607699
Tubastatin A (trifluoroacetate salt)	0.644252	0.918333	0.60001	0.0728159	0.666481	0.0600521	0.131434	0.517977	0.0160021	0.0384322	0.950907	0.984846	0.0336632	0.932626	0.00952538	0.481115	0.446738	0.194869	0.454957	0.652069	0.592354	0.250809	0.480919	0.31035	0.652069	0.295251	1	0.498238	0.0741806	0.0227265	0.141511	0.0827752
UNC0224	0.0793114	0.0891508	0.456308	0.000247266	0.758201	0.339918	0.527975	0.0904313	0.415713	0.0461802	0.0741866	0.781732	0.0524551	0.167328	0.535278	0.0518413	0.00370126	0.158826	0.159287	0.756571	0.741286	0.933567	0.787212	0.397884	0.652069	0.666481	0.35817	0.460008	0.805469	0.00380759	0.513721	0.0682555
UNC0321 (trifluoroacetate salt)	0.229914	0.328686	0.553607	0.0947839	0.0421766	0.478914	0.853456	0.371997	0.69008	0.119528	0.666488	0.558608	0.805473	0.105149	0.310347	0.405788	0.821636	0.204752	0.204759	0.192494	0.0590141	0.625381	0.349908	0.167331	0.310343	0.0563091	0.476996	0.865547	0.371992	0.0137894	0.857709	0.3761
UNC0631	0.388712	0.259376	0.00296468	0.000815336	0.109423	0.0741775	0.147925	0.0106163	0.0220969	0.50865	0.229919	0.0227222	0.0055963	0.00527305	0.0131428	0.958426	0.00370126	0.025996	0.276229	0.0289609	0.602129	0.0156329	0.0622462	0.0908728	0.352391	0.478919	0.000792538	0.00462291	0.0137874	0.109431	0.0128765	0.0976873
UNC0638	0.00380722	0.72576	0.213872	0.000815336	0.0604015	0.853453	0.414607	0.0115929	0.70625	0.017239	0.0847271	0.926417	0.00971421	0.00742536	0.00575045	0.0518413	0.0112057	0.652069	0.0424609	0.204752	0.259651	0.0695465	0.556567	0.297102	0.0193357	0.853459	0.000792538	0.00380649	0.339923	0.0055963	0.298392	0.3761
UNC0642	0.00380722	0.0813221	0.0619677	0.000852364	0.926415	0.0193022	0.793571	0.231463	0.474263	0.588667	0.0288412	0.975441	0.853462	0.0396698	0.910251	0.0370374	0.0068243	1	0.592357	0.310343	0.0908702	0.238431	0.412332	0.139014	0.553989	0.758201	0.0185836	0.347759	0.0193035	0.109431	1	0.0176161
UNC0646	0.00380722	0.241583	0.268278	0.000815336	0.441531	0.926417	0.6777	0.0209542	0.415713	9.40113e-05	0.147942	0.914196	0.00674914	0.0396698	0.0370374	0.573021	0.00370126	0.247924	0.553995	0.048536	0.23658	0.286261	0.656399	0.0908728	0.535275	0.242078	0.00183944	0.00380649	0.309683	0.0288412	0.0142734	0.00369436
UNC1215	0.0506052	0.479604	0.351212	0.0796257	0.0488149	0.441526	0.19602	0.414085	0.560158	0.0043537	0.0453981	0.196025	0.229919	0.0424593	0.150661	0.0279439	0.00370126	0.0424576	0.165813	0.18534	0.590117	0.497283	0.444384	0.430085	0.463743	0.781734	0.0484764	0.963169	0.281277	0.0227265	0.8349	0.915414
UNC1999	0.355734	0.427612	0.731468	0.70577	0.069327	0.00419672	0.355719	0.746777	0.94339	0.339121	0.339933	0.109419	0.666488	0.573021	0.0087729	0.0179254	0.0424609	0.0300137	0.394528	0.114539	0.367177	0.29467	0.00684424	0.821636	0.367173	0.689011	0.753491	0.805467	0.0055953	0.131451	0.856656	0.436043
Valproic Acid (sodium salt)	0.841403	0.965101	0.0328126	0.566418	0.0150169	0.901997	0.538091	0.0793114	0.67405	0.0146202	0.0453981	0.498238	0.0170434	0.799786	0.735239	0.573021	0.463751	0.150657	0.0582242	0.0609265	0.430082	0.886369	0.17646	0.352399	0.631888	0.216979	0.710939	0.734887	0.71182	0.372002	0.578351	0.347859
WDR5-0103	0.622333	0.549166	0.303236	0.478348	0.677707	0.817402	0.288192	0.622333	0.788967	0.255889	0.386418	0.458834	0.372002	0.821634	0.652071	0.102161	0.0232973	0.150657	0.434256	0.778092	0.39788	0.676833	0.273636	0.31035	0.843621	0.71182	0.976029	0.829383	0.20689	0.0289443	0.297361	0.630642
Zebularine	0.950907	0.638716	0.0569979	0.829166	0.0964406	0.0693241	0.423472	0.139505	0.596222	0.56998	0.106432	0.0488126	0.00811116	0.185344	0.271752	0.0495849	0.225609	0.85466	0.0553329	0.352391	1	0.893961	0.706874	0.154704	0.943834	0.877671	0.146409	0.498238	0.324574	0.147942	0.783383	0.32153

## Sheet: Supplementary Table S3
Compound	Avg. Cell Viability	Std. Deviation	p Value
Panobinostat	0.5185	23.926	1.06032e-40
LAQ824	0.560751	24.0051	2.16379e-36
HC Toxin	0.593836	24.7181	3.15706e-32
Gemcitabine	0.714209	22.3078	6.58375e-25
JIB-04	0.772591	28.9121	4.60067e-13
SB939	0.796423	23.6942	9.2968e-15
Apicidin	0.800822	22.8707	4.94625e-15
UNC0631	0.815365	27.6693	4.51257e-10
Trichostatin A	0.816633	21.2653	8.22432e-15
6-Thioguanine	0.828229	20.9643	8.77505e-14
CPI-203	0.830806	20.5502	7.1385e-14
UNC0646	0.834001	26.4678	2.0273e-09
CAY10398	0.834976	20.3363	1.76663e-13
(+)-JQ1	0.842938	19.5382	2.12945e-13
Lestaurtinib	0.846483	18.2956	5.48734e-14
MI-nc (hydrochloride)	0.858123	21.1786	2.52745e-10
UNC0638	0.863778	26.9123	7.58154e-07
CAY10603	0.866224	19.7226	2.48781e-10
BIX01294 (hydrochloride hydrate)	0.867403	26.2045	9.69653e-07
I-BET762	0.872759	16.9457	1.04913e-15
M 344	0.880738	18.1214	6.10858e-10
4-iodo-SAHA	0.88143	18.8911	2.74629e-09
OTX015	0.88817	18.713	1.21384e-08
SAHA	0.8909	19.6307	6.52606e-10
Oxamflatin	0.896199	15.977	1.23359e-09
I-BET151	0.904473	15.8004	8.4559e-09
coumarin-SAHA	0.906378	15.7899	1.73569e-08
ITF 2357	0.915098	18.636	7.90846e-06
CUDC-101	0.921308	17.4317	1.40856e-05
UNC0642	0.924487	22.0971	0.000609746
MS-275	0.924926	17.2982	2.1888e-05
CPTH2 (hydrochloride)	0.926252	12.7977	4.86308e-08
3-Deazaneplanocin A	0.928075	14.7411	2.56882e-06
CI-994	0.931182	12.6784	2.34143e-07
Bromosporine	0.932796	17.774	0.000229807
Scriptaid	0.93503	14.1577	7.53603e-06
UNC0224	0.938556	18.6679	0.00109737
PFI-1	0.939811	14.9572	7.66962e-05
3-Deazaneplanocin A (hydrochloride)	0.943639	15.1589	0.000225234
Pyroxamide	0.946044	13.8386	0.000159874
Sodium Butyrate	0.951612	15.7479	0.00206793
CBHA	0.951804	11.3593	4.87831e-05
Rucaparib (phosphate)	0.953604	13.7731	0.000869762
Pimelic Diphenylamide 106	0.956057	15.548	0.0048721
Phthalazinone pyrazole	0.956259	17.733	0.0131833
(-)-Neplanocin A	0.957952	14.645	0.00435461
Tenovin-6	0.960527	14.7004	0.00779663
S-Adenosylhomocysteine	0.960592	14.7189	0.00855111
Splitomicin	0.960809	12.1782	0.00170375
GSK-J2 (sodium salt)	0.964723	10.9292	0.00170934
RVX-208	0.96501	11.2387	0.00250589
Methylstat (hydrate)	0.968619	13.305	0.0196354
Decitabine	0.968978	12.071	0.00328271
GSK126	0.969011	13.2921	0.0210627
Lomeguatrib	0.969844	11.4678	0.00953517
Ellagic Acid	0.970148	11.3531	0.00929111
IOX1	0.97045	10.662	0.00667393
Etoposide	0.970959	13.3435	0.0288586
Tenovin-1	0.971091	10.3339	0.00655751
(R)-PFI-2 (hydrochloride)	0.972995	16.7499	0.104799
Garcinol	0.97355	10.5236	0.0141712
UNC1999	0.97387	10.8388	0.0203356
DMOG	0.976082	12.7884	0.0615084
C646	0.976097	10.3772	0.00977317
Salermide	0.976435	10.5469	0.0287997
SGI-1027	0.976832	13.9986	0.0986732
Valproic Acid (sodium salt)	0.977004	9.85313	0.0245613
SGC0946	0.977183	12.2368	0.0689986
Chidamide	0.978195	11.6369	0.0686198
Tubacin	0.978319	11.8862	0.0706856
Mirin	0.978941	11.6615	0.0751652
EX-527	0.98005	10.7486	0.0681159
BRD73954	0.980211	9.13421	0.0350632
GSK4112	0.981106	10.4477	0.0736958
3,3'-Diindolylmethane	0.981339	10.9809	0.0953351
Butyrolactone 3	0.981479	9.72485	0.0672124
Sinefungin	0.981538	13.7948	0.179332
5-Azacytidine	0.982839	9.31912	0.075499
2',3',5'-triacetyl-5-Azacytidine	0.983374	8.7711	0.066024
Tubastatin A (trifluoroacetate salt)	0.983546	8.71719	0.0707373
MI-2 (hydrochloride)	0.983763	10.4155	0.127418
Zebularine	0.984361	11.8131	0.192258
Sirtinol	0.984391	10.5859	0.145168
(+)-Abscisic Acid	0.984949	11.139	0.185284
RSC-133	0.986478	9.43377	0.164944
AK-7	0.986636	12.1961	0.276756
Sodium 4-Phenylbutyrate	0.986777	11.6657	0.260117
3-amino Benzamide	0.986812	10.5571	0.220605
Anacardic Acid	0.986837	8.95596	0.157036
HNHA	0.987064	9.26608	0.177024
PCI 34051	0.987593	9.89282	0.217798
S-(5'-Adenosyl)-L-methionine (tosylate)	0.987824	15.5757	0.424804
trans-Resveratrol	0.989294	9.62667	0.275577
I-CBP112 (hydrochloride)	0.990172	10.93	0.373775
Tubastatin A	0.990201	10.775	0.368932
Delphinidin (chloride)	0.991097	9.51028	0.359083
RG-108	0.992268	7.98969	0.35224
Octyl-a-ketoglutarate	0.993274	11.8009	0.566837
BSI-201	0.993732	11.4108	0.586764
GSK343	0.993831	10.781	0.573092
GSK-J1 (sodium salt)	0.994349	11.4436	0.622007
SGC-CBP30	0.995045	10.0305	0.576912
AGK2	0.995299	11.0419	0.676953
CAY10591	0.995776	14.104	0.761702
2,4-Pyridinedicarboxylic Acid	0.995928	11.9366	0.733619
CCG-100602	0.996182	11.1326	0.734798
Piceatannol	0.9962	10.2902	0.717178
a-Hydroxyglutaric Acid (sodium salt)	0.996371	10.1527	0.722955
UNC0321 (trifluoroacetate salt)	0.996865	10.6729	0.771531
Cl-Amidine (hydrochloride)	0.997146	8.44644	0.746977
BML-210	0.998307	10.7192	0.875877
N-Oxalylglycine	0.998446	10.2041	0.881316
UNC1215	0.998699	12.515	0.918559
GSK-J4 (hydrochloride)	0.998765	9.59423	0.899822
CAY10669	0.998904	11.6904	0.925264
(-)-JQ1	0.999052	11.9405	0.93659
MC 1568	0.999246	7.96468	0.9274
GSK2801	1.00044	9.6723	0.964827
JGB1741	1.00102	9.04294	0.912678
1-Naphthoic Acid	1.00313	11.9432	0.79721
CAY10683	1.00341	9.23057	0.718969
Isoliquiritigenin	1.00412	10.8027	0.706247
EPZ005687	1.00443	7.83929	0.592193
5-Methyl-2'-deoxycytidine	1.00509	10.1086	0.626226
WDR5-0103	1.00535	7.53343	0.507161
Nicotinamide	1.00547	12.319	0.658349
RGFP966	1.00548	10.9159	0.617681
F-Amidine (trifluoroacetate salt)	1.00668	9.12911	0.480727
HPOB	1.00742	10.4877	0.483619
Daminozide	1.00802	11.5274	0.492742
2-PCPA (hydrochloride)	1.00946	9.07557	0.31382
EPZ5676	1.01019	9.35013	0.286973
PFI-3	1.01212	11.7053	0.305265
Suramin (sodium salt)	1.01251	11.5249	0.281286
2-hexyl-4-Pentynoic Acid	1.01445	10.856	0.198856
SIRT1/2 Inhibitor IV	1.01641	9.78463	0.101918
GSK-LSD1 (hydrochloride)	1.02136	10.485	0.0469738
AGK7	1.02278	10.8205	0.0395789
5-Methylcytidine	1.03545	11.2748	0.00248469

## Sheet: Supplementary Table S4
Sample	Cell Viability	p Value	Compound
CH157*	0.285734	0.00380722	CAY10398
GAR*	0.386744	0.116675	LAQ824
H23-3	0.403653	0.00296468	UNC0631
IOMM Lee*	0.221495	0.000815336	UNC0631
J10-6	0.466478	0.00380685	Panobinostat
J11-2	0.529776	0.00380649	JIB-04
J11-6	0.48101	0.00380612	Panobinostat
J11-7	0.538505	0.00380722	Panobinostat
J13-2	0.460363	3.72306e-05	LAQ824
J15-4	0.821859	4.939e-05	JIB-04
J16-5	0.400375	0.00380759	Panobinostat
J17-2	0.591484	0.00380649	Panobinostat
J17-7	0.329102	0.00380759	Panobinostat
J18-6	0.257039	0.00370098	JIB-04
J18-7	0.477649	0.00370098	Panobinostat
J19-2	0.285427	0.00370098	Panobinostat
J19-3	0.356573	0.00370126	JIB-04
J19-4	0.327649	0.00370071	JIB-04
J19-5	0.37396	0.00370126	Panobinostat
J19-6	0.305154	0.00370071	JIB-04
J19-7	0.254724	0.00370098	Panobinostat
J2-2	0.385257	0.00352824	LAQ824
J21-4	0.499827	5.03503e-05	Panobinostat
J21-5	0.360155	0.00370126	Panobinostat
J21-7	0.526805	0.00370071	Panobinostat
J4-1	0.887693	0.0209528	OTX015
J4-4	0.240209	0.000792538	BIX01294 (hydrochloride hydrate)
J7-6	0.286848	0.00380649	HC Toxin
J8-3	0.511469	0.00380685	OTX015
J8-4	0.214384	0.00380759	LAQ824
J9-3	0.421948	0.00368416	Panobinostat
JEN*	0.277219	0.0181455	HC Toxin

## Sheet: Supplementary Table S5
a) Grade 1 Broadly Effective Compounds
Compound	Avg. Cell Viability	Std. Deviation	p Value	Category
Panobinostat	0.518865	24.7923	1.04543e-30	Grade1
HC Toxin	0.592866	24.4893	1.16294e-25	Grade1
LAQ824	0.599963	23.993	1.88659e-25	Grade1
Gemcitabine	0.73878	21.4445	2.04247e-18	Grade1
JIB-04	0.790352	27.8473	1.10001e-09	Grade1
CPI-203	0.796113	20.922	7.60682e-14	Grade1
b) Grade 2 Broadly Effective Compounds
Compound	Avg. Cell Viability	Std. Deviation	p Value	Category
LAQ824	0.44798	16.8098	1.67449e-12	Grade2
Panobinostat	0.526983	19.0724	3.03935e-10	Grade2
HC Toxin	0.643147	24.529	1.69062e-06	Grade2
Gemcitabine	0.655574	16.8631	8.38504e-09	Grade2
JIB-04	0.712336	31.4414	0.000450337	Grade2
SB939	0.769758	19.0289	1.9759e-05	Grade2
Apicidin	0.775917	22.4023	0.000181004	Grade2
Trichostatin A	0.785829	26.9756	0.0016498	Grade2
CAY10398	0.791918	24.76	0.00100526	Grade2
c) Grade 3 Broadly Effective Compounds
Compound	Avg. Cell Viability	Std. Deviation	p Value	Category
UNC0631	0.221495	1.17309	1.82119e-35	Grade3
UNC0646	0.224045	2.89675	1.38722e-08	Grade3
MI-nc (hydrochloride)	0.241616	7.42914	0.000132715	Grade3
HC Toxin	0.275503	0.984508	1.08988e-27	Grade3
SB939	0.289026	4.15024	3.49978e-06	Grade3
CAY10603	0.302251	10.3841	0.000684838	Grade3
4-iodo-SAHA	0.315236	4.14203	4.02292e-06	Grade3
6-Thioguanine	0.31696	6.29031	8.24048e-05	Grade3
UNC0638	0.31919	19.5953	0.00585804	Grade3
Apicidin	0.320503	4.63232	1.12114e-05	Grade3
UNC0642	0.346469	25.4248	0.0140103	Grade3
LAQ824	0.391322	31.6677	0.0125327	Grade3
Panobinostat	0.466215	33.4982	0.0496055	Grade3
(-)-Neplanocin A	0.477466	11.4253	0.00234871	Grade3
CAY10398	0.501483	18.0841	0.0113087	Grade3
MS-275	0.503187	15.7291	0.00755431	Grade3
SAHA	0.533116	27.9138	0.0199175	Grade3
UNC0224	0.558717	24.1034	0.0146835	Grade3
CI-994	0.593188	22.8099	0.0371788	Grade3
3-Deazaneplanocin A (hydrochloride)	0.63767	12.3963	0.0091445	Grade3
3-Deazaneplanocin A	0.707714	15.93	0.0142717	Grade3

## Sheet: Supplementary Table S6
	p Value
Compound	Grade2-Grade1	Grade3-Grade1	Grade3-Grade2
(-)-Neplanocin A	0.309654	1.10578e-13	3.53954e-11
4-iodo-SAHA	0.0309411	7.66698e-12	2.29152e-08
6-Thioguanine	0.981415	5.21266e-07	3.39958e-06
Apicidin	0.546403	1.88581e-05	0.000360932
CAY10398	0.302155	0.00114979	0.018166
CAY10603	0.0511311	1.24077e-10	1.66779e-07
CPI-203	0.00186295	0.75553	0.641751
Gemcitabine	0.266874	0.0876262	0.395616
HC Toxin	0.67383	0.071536	0.0413274
JIB-04	0.514533	0.884393	0.994102
LAQ824	0.0228278	0.128335	0.875393
MI-nc (hydrochloride)	0.411693	1.74524e-10	2.44321e-08
Panobinostat	0.989543	0.904671	0.889269
SB939	0.525443	1.17564e-05	0.000256653
Trichostatin A	0.542833	0.00646796	0.0410769
UNC0631	0.628708	2.42701e-05	1.46633e-05
UNC0638	0.652228	4.5817e-05	0.000578143
UNC0642	0.374068	2.03566e-08	1.79666e-06
UNC0646	0.499481	1.69751e-06	5.38222e-05

## Sheet: Supplementary Table S7
a) Primary Tumor Broadly Effective Compounds
Compound	Avg. Cell Viability	Std. Deviation	p Value	Category
Panobinostat	0.521364	24.3212	2.34468e-36	Primary
LAQ824	0.56201	23.2062	6.61542e-34	Primary
HC Toxin	0.592465	24.3328	2.87855e-30	Primary
Gemcitabine	0.715408	20.9761	2.11087e-24	Primary
JIB-04	0.781522	28.1165	1.09282e-11	Primary
b) Recurrent Tumor Broadly Effective Compounds
Compound	Avg. Cell Viability	Std. Deviation	p Value	Category
Panobinostat	0.489866	20.4036	2.28466e-05	Recurrent
LAQ824	0.54965	31.5345	0.000790553	Recurrent
HC Toxin	0.608768	30.2294	0.00464019	Recurrent
Apicidin	0.619189	28.8953	0.00240799	Recurrent
SB939	0.627134	29.8973	0.00337419	Recurrent
UNC0631	0.639129	36.4444	0.0121	Recurrent
MI-nc (hydrochloride)	0.657929	36.4027	0.0156737	Recurrent
CAY10603	0.66341	33.007	0.0104101	Recurrent
UNC0646	0.670118	39.4766	0.0268336	Recurrent
6-Thioguanine	0.671	32.3884	0.0106216	Recurrent
4-iodo-SAHA	0.672408	31.8969	0.0100325	Recurrent
JIB-04	0.69222	35.8502	0.0173566	Recurrent
UNC0638	0.694921	34.401	0.0205884	Recurrent
Gemcitabine	0.702222	34.4268	0.0230569	Recurrent
Trichostatin A	0.704777	29.6628	0.0117929	Recurrent
BIX01294 (hydrochloride hydrate)	0.743201	35.5473	0.0483023	Recurrent
CAY10398	0.765944	25.232	0.0166923	Recurrent
UNC0224	0.772682	27.3076	0.020164	Recurrent
(-)-Neplanocin A	0.773596	27.0131	0.0265249	Recurrent
M 344	0.788598	29.4998	0.0498157	Recurrent
CI-994	0.799775	22.7173	0.0212122	Recurrent

## Sheet: Supplementary Table S8
	p Value
Compound	Primary-Recurrent
4-iodo-SAHA	0.0493424
6-Thioguanine	0.129015
Apicidin	0.0591262
CAY10603	0.0621547
Gemcitabine	0.907763
HC Toxin	0.878574
JIB-04	0.440442
LAQ824	0.90181
MI-nc (hydrochloride)	0.0898188
Panobinostat	0.65617
SB939	0.0842035
Trichostatin A	0.229012
UNC0631	0.131325
UNC0638	0.12719
UNC0646	0.18776

## Sheet: Supplementary Table S9
a) Tumors with No History of Radiation Broadly Effective Compounds
Compound	Avg. Cell Viability	Std. Deviation	p Value	Category
Panobinostat	0.524503	23.0825	7.81881e-35	No Radiation
LAQ824	0.589816	23.0399	6.51098e-30	No Radiation
HC Toxin	0.627429	24.5959	9.51296e-26	No Radiation
Gemcitabine	0.738014	18.7194	1.38371e-23	No Radiation
JIB-04	0.776921	28.5791	4.57071e-11	No Radiation
b) Tumors with a Prior History of Radiation Broadly Effective Compounds
Compound	Avg. Cell Viability	Std. Deviation	p Value	Category
JIB-04	0.257039	9.59402	0.00429238	Prior Radiation
Panobinostat	0.317717	1.43454	2.80708e-16	Prior Radiation
LAQ824	0.357808	8.46354	0.00417854	Prior Radiation
HC Toxin	0.422453	8.43825	0.00521638	Prior Radiation
CPI-203	0.434527	1.31186	7.50303e-18	Prior Radiation
(+)-JQ1	0.483357	17.3357	0.0342764	Prior Radiation
Gemcitabine	0.531845	2.51462	3.07617e-06	Prior Radiation
Lestaurtinib	0.54962	4.4966	0.000890581	Prior Radiation
Apicidin	0.601726	10.9357	0.0216861	Prior Radiation
I-BET762	0.639964	18.2526	0.00446004	Prior Radiation
Bromosporine	0.686486	11.8343	0.0414615	Prior Radiation
6-Thioguanine	0.711329	4.58922	0.00322912	Prior Radiation
BSI-201	0.729799	7.21279	0.0177296	Prior Radiation
Phthalazinone pyrazole	0.730449	5.82674	0.00950978	Prior Radiation
3-Deazaneplanocin A (hydrochloride)	0.754072	6.88051	0.0191717	Prior Radiation
2,4-Pyridinedicarboxylic Acid	0.766617	8.40753	0.0353489	Prior Radiation
UNC0631	0.776496	4.5135	0.00589447	Prior Radiation
(-)-JQ1	0.788729	8.6572	0.0461786	Prior Radiation
Trichostatin A	0.79421	4.75636	0.00898954	Prior Radiation
c) Tumors with a Non-Specified History of Radiation Broadly Effective Compounds
Compound	Avg. Cell Viability	Std. Deviation	p Value	Category
HC Toxin	0.356561	9.17646	3.07063e-13	Not Specified
SB939	0.390372	11.2846	6.20668e-14	Not Specified
UNC0646	0.404984	27.1279	1.21927e-06	Not Specified
LAQ824	0.415322	25.9795	8.73975e-07	Not Specified
6-Thioguanine	0.454016	21.6471	5.88102e-08	Not Specified
MI-nc (hydrochloride)	0.500271	25.6782	2.00113e-06	Not Specified
CAY10398	0.505765	23.6014	1.91713e-06	Not Specified
Apicidin	0.510983	21.3074	5.80606e-07	Not Specified
Panobinostat	0.521838	30.0762	2.20189e-05	Not Specified
SAHA	0.539386	22.3153	2.18209e-06	Not Specified
CAY10603	0.556838	28.4351	2.70037e-05	Not Specified
Trichostatin A	0.569155	24.8498	7.81595e-06	Not Specified
BIX01294 (hydrochloride hydrate)	0.574033	33.4382	0.000357911	Not Specified
UNC0642	0.593023	30.3424	0.000128875	Not Specified
Gemcitabine	0.595151	37.7056	0.00146501	Not Specified
UNC0638	0.597469	35.5786	0.000971729	Not Specified
M 344	0.621507	24.4152	5.34862e-05	Not Specified
UNC0631	0.630699	38.1568	0.00218977	Not Specified
Oxamflatin	0.641478	21.0213	1.85515e-05	Not Specified
MS-275	0.672261	23.0831	6.98752e-05	Not Specified
4-iodo-SAHA	0.717705	29.1796	0.00317746	Not Specified
3-Deazaneplanocin A	0.786006	13.5755	1.85006e-05	Not Specified
CI-994	0.786148	20.0594	0.00237521	Not Specified
UNC0224	0.786637	23.9607	0.00414313	Not Specified
ITF 2357	0.791713	26.8617	0.0168354	Not Specified
(-)-Neplanocin A	0.792551	23.4454	0.00592485	Not Specified

## Sheet: Supplementary Table S10
a) Female-Derived Patient Tumors Broadly Effective Compounds
Compound	Avg. Cell Viability	Std. Deviation	p Value	Category
Panobinostat	0.530897	23.6832	4.09598e-31	Female
LAQ824	0.58368	23.8635	3.75394e-27	Female
HC Toxin	0.62816	24.7683	1.10497e-23	Female
Gemcitabine	0.735061	19.0001	7.97647e-22	Female
JIB-04	0.744612	30.2436	1.69006e-11	Female
b) Male-Derived Patient Tumors Broadly Effective Compounds
Compound	Avg. Cell Viability	Std. Deviation	p Value	Category
HC Toxin	0.453273	19.3097	1.13622e-11	Male
Panobinostat	0.476353	24.7553	9.62429e-11	Male
LAQ824	0.480503	23.2241	7.08091e-11	Male
SB939	0.551724	25.1141	6.71091e-09	Male
6-Thioguanine	0.611503	24.9797	4.29168e-08	Male
UNC0646	0.639403	36.5797	7.27928e-05	Male
Gemcitabine	0.639489	30.8174	7.70071e-06	Male
Apicidin	0.649238	24.5738	3.53316e-07	Male
BIX01294 (hydrochloride hydrate)	0.660163	34.1028	6.40111e-05	Male
UNC0631	0.668765	35.102	8.77519e-05	Male
CAY10398	0.697835	25.557	6.61466e-06	Male
Trichostatin A	0.705781	24.3627	3.03627e-06	Male
UNC0638	0.709432	37.475	0.000961964	Male
MI-nc (hydrochloride)	0.709559	31.5368	0.00011845	Male
CAY10603	0.724886	28.7948	7.6663e-05	Male
SAHA	0.72549	28.6054	3.68244e-05	Male
M 344	0.749488	22.214	1.30031e-05	Male
CPI-203	0.759485	19.9322	3.08282e-06	Male
UNC0642	0.761909	33.1644	0.00194502	Male
Oxamflatin	0.780948	20.3922	2.55483e-05	Male
4-iodo-SAHA	0.796721	24.2768	0.000474967	Male
MS-275	0.799494	18.6202	1.68828e-05	Male

[truncated: 1 more sheets: Supplementary Table S11]
